1  
2  
3  
4  
5  
6  
7  
8  
9  
10  
11  
12  
13  
14  
15  
16  
17  
18  
19  
20  
21  
22  
23  
24

**Conserved microRNA targeting reveals preexisting gene dosage sensitivities that shaped amniote sex chromosome evolution**

Sahin Naqvi<sup>1,2</sup>, Daniel W. Bellott<sup>1</sup>, Kathy S. Lin<sup>1,3</sup>, & David C. Page<sup>1,2,4</sup>

<sup>1</sup> Whitehead Institute, Cambridge MA 02142;

<sup>2</sup> Department of Biology, Massachusetts Institute of Technology, Cambridge MA 02139

<sup>3</sup> Program in Computational and Systems Biology, Massachusetts Institute of Technology,  
Cambridge MA 02139

<sup>4</sup> Howard Hughes Medical Institute, Whitehead Institute, Cambridge MA 02142

25 **Mammalian X and Y chromosomes evolved from an ordinary autosomal pair. Genetic**  
26 **decay of the Y led to X chromosome inactivation (XCI) in females, but some Y-linked genes**  
27 **were retained during the course of sex chromosome evolution, and many X-linked genes**  
28 **did not become subject to XCI. We reconstructed gene-by-gene dosage sensitivities on the**  
29 **ancestral autosomes through phylogenetic analysis of microRNA (miRNA) target sites and**  
30 **compared these preexisting characteristics to the current status of Y-linked and X-linked**  
31 **genes in mammals. Preexisting heterogeneities in dosage sensitivity, manifesting as**  
32 **differences in the extent of miRNA-mediated repression, predicted either the retention of a**  
33 **Y homolog or the acquisition of XCI following Y gene decay. Analogous heterogeneities**  
34 **among avian Z-linked genes predicted either the retention of a W homolog or gene-specific**  
35 **dosage compensation following W gene decay. Genome-wide analyses of human copy**  
36 **number variation indicate that these heterogeneities consisted of sensitivity to both**  
37 **increases and decreases in dosage. We propose a model of XY/ZW evolution incorporating**  
38 **such preexisting dosage sensitivities in determining the evolutionary fates of individual**  
39 **genes. Our findings thus provide a more complete view of the role of dosage sensitivity in**  
40 **shaping the mammalian and avian sex chromosomes, and reveal an important role for**  
41 **post-transcriptional regulatory sequences (miRNA target sites) in sex chromosome**  
42 **evolution.**

43

## 44 **INTRODUCTION**

45 The mammalian X and Y chromosomes evolved from a pair of ordinary autosomes over the past  
46 300 million years (Lahn & Page, 1999). Only 3% of genes on the ancestral pair of autosomes  
47 survive on the human Y chromosome (Bellott et al., 2010; Skaletsky et al., 2003), compared to

48 98% on the X chromosome (Mueller et al., 2013). In females, one copy of the X chromosome is  
49 silenced by X inactivation (XCI); this silencing evolved on a gene-by-gene basis following Y  
50 gene loss and compensatory X upregulation (Berletch et al., 2015; Jegalian & Page, 1998; Ross  
51 et al., 2005; Tukiainen et al., 2017), and some genes escape XCI in humans (Carrel & Willard,  
52 2005) and other mammals (Yang, Babak, Shendure, & Disteche, 2010). In mammals, dosage  
53 compensation, which refers to any mechanism restoring ancestral dosage following gene loss  
54 from the sex-specific chromosome, thus consists of both X upregulation following Y gene loss  
55 and the subsequent acquisition of XCI.

56 In parallel, the avian Z and W sex chromosomes evolved from a different pair of  
57 autosomes than the mammalian X and Y chromosomes (Bellott et al., 2010; Nanda et al., 1999;  
58 Ross et al., 2005). Decay of the female-specific W chromosome was similarly extensive, but  
59 birds did not evolve a large-scale inactivation of Z-linked genes analogous to XCI in mammals  
60 (Itoh et al., 2007). Dosage compensation, as measured by a male/female expression ratio close to  
61 1, has been observed for some Z-linked genes in some tissues. (Mank & Ellegren, 2009; Uebbing  
62 et al., 2015; Zimmer, Harrison, Dessimoz, & Mank, 2016). Thus, genes previously found on the  
63 ancestral autosomes that gave rise to the mammalian or avian sex chromosomes have undergone  
64 significant changes in gene dosage. In modern mammals, these molecular events have resulted in  
65 three classes of ancestral X-linked genes representing distinct evolutionary fates: those with a  
66 surviving Y homolog, those with no Y homolog and subject to XCI, and those with no Y  
67 homolog but escaping XCI. In birds, two clear classes of ancestral Z-linked genes have arisen:  
68 those with or without a W homolog, with additional heterogeneity among Z-linked genes without  
69 a W homolog as a result of gene-specific dosage compensation. Identifying gene-by-gene  
70 properties that distinguish classes of X- and Z-linked genes is thus crucial to understanding the

71 selective pressures underlying the molecular events of mammalian and avian sex chromosome  
72 evolution.

73 Emerging evidence suggests a role for gene dosage sensitivity in mammalian and avian  
74 sex chromosome evolution. X- and Z-linked genes with surviving homologs on the mammalian  
75 Y or avian W chromosomes are enriched for important regulatory functions and predictors of  
76 haploinsufficiency compared to those lacking Y or W homologs (Bellott et al., 2014, 2017);  
77 similar observations have been made in fish (White, Kitano, & Peichel, 2015) and *Drosophila*  
78 (Kaiser, Zhou, & Bachtrog, 2011). Human X- and chicken Z-linked genes that show the  
79 strongest signatures of dosage compensation in either lineage also show signs of dosage  
80 sensitivity as measured by membership in large protein complexes (Pessia, Makino, Bailly-  
81 Bechet, McLysaght, & Marais, 2012) or evolutionary patterns of gene duplication and retention  
82 (Zimmer et al., 2016). Despite these advances, little is known regarding selective pressures  
83 resulting from sensitivity to dosage increases, as these studies either focused on  
84 haploinsufficiency or employed less direct predictors of dosage sensitivity. Furthermore, it is not  
85 known whether heterogeneities in dosage sensitivity among classes of sex-linked genes were  
86 acquired during sex chromosome evolution, or predated the emergence of sex chromosomes, as  
87 there has been no explicit, systematic reconstruction of dosage sensitivity on the ancestral  
88 autosomes that gave rise to the mammalian and avian sex chromosomes.

89 To assess the role of preexisting dosage sensitivities in XY and ZW evolution, we sought  
90 to employ a measure of dosage sensitivity that could be 1) demonstrably informative with respect  
91 to sensitivity to dosage increases, and 2) explicitly reconstructed on the ancestral autosomes. We  
92 focused on regulation by microRNAs (miRNAs), small noncoding RNAs that function as tuners  
93 of gene dosage by lowering target mRNA levels through pairing to the 3' untranslated region

94 (UTR) (Bartel, 2009). The repressive nature of miRNA targeting is informative with respect to  
95 sensitivity to dosage increases, allowing for a more complete understanding of the role of dosage  
96 sensitivity in sex chromosome evolution. Both miRNAs themselves and their complementary  
97 target sites can be preserved over millions of years of vertebrate evolution, facilitating the  
98 reconstruction of miRNA targeting on the ancestral autosomes through cross-species sequence  
99 alignments. As miRNA targeting occurs post-transcriptionally, reconstruction of its ancestral  
100 state is decoupled from transcriptional regulatory mechanisms such as XCI that evolved  
101 following X-Y differentiation.

102

## 103 **RESULTS**

### 104 **Analysis of human copy number variation indicates conserved microRNA targeting of** 105 **genes sensitive to dosage increases**

106 We first sought to determine whether conserved targeting by microRNAs (miRNAs) correlates  
107 with sensitivity to dosage increases across the human genome. To estimate pressure to maintain  
108 miRNA targeting, we used published probabilities of conserved targeting ( $P_{CT}$  scores) for each  
109 gene-miRNA interaction in the human genome. The  $P_{CT}$  score reflects an estimate of the  
110 probability that a given gene-miRNA interaction is conserved due to miRNA targeting, obtained  
111 by calculating the conservation of the relevant miRNA target sites relative to the conservation of  
112 the entire 3' UTR (Friedman, Farh, Burge, & Bartel, 2009). In this manner, the  $P_{CT}$  score  
113 intrinsically controls for differences in background conservation and sequence composition, both  
114 of which vary widely among 3'UTRs due to differing rates of expression divergence and/or  
115 sequence evolution. We refer to these  $P_{CT}$  scores as “miRNA conservation scores” in the  
116 remainder of the text.

117           A recent study reported a correlation between these miRNA conservation scores and  
118 predicted haploinsufficiency (Pinzón et al., 2016), indicating that conserved miRNA targeting  
119 broadly corresponds to dosage sensitivity. However, such a correlation does not isolate the  
120 effects of sensitivity to dosage increases, which we expect to be particularly important in the  
121 context of miRNA targeting. We reasoned that genes for which increases in dosage are  
122 deleterious should be depleted from the set of observed gene duplications in healthy human  
123 individuals. We used a catalogue of rare genic copy number variation among 59,898 control  
124 human exomes (Exome Aggregation Consortium, ExAC)(Ruderfer et al., 2016) to classify  
125 autosomal protein-coding genes as exhibiting or lacking duplication or deletion in healthy  
126 individuals (see Methods). We compared duplicated and non-duplicated genes with the same  
127 deletion status in order to control for differences in sensitivity to underexpression. We found that  
128 non-duplicated genes have significantly higher miRNA conservation scores than duplicated  
129 genes, irrespective of deletion status (Figure 1A,B). Non-deleted genes also have significantly  
130 higher scores than deleted genes irrespective of duplication status (Supplemental Figure S1), but  
131 duplication status has a greater effect on miRNA conservation scores than does deletion status  
132 (blue vs. orange boxes, Figure 1C). Thus, conserved miRNA targeting is a feature of genes  
133 sensitive to changes in gene dosage in humans and is especially informative with regards to  
134 sensitivity to dosage increases, consistent with the known role of miRNAs in tuning gene dosage  
135 by lowering target mRNA levels.  
136

137 **X-Y pairs and X-inactivated genes have higher miRNA conservation scores than X escape**  
138 **genes**

139 We next assessed whether the three classes of X-linked genes differ with respect to dosage  
140 sensitivity as inferred by conserved miRNA targeting. To delineate these classes, we began with  
141 the set of ancestral genes reconstructed through cross-species comparisons of the human X  
142 chromosome and orthologous chicken autosomes (Bellott et al., 2014, 2017, 2010; Hughes et al.,  
143 2012; Mueller et al., 2013). We designated ancestral X-linked genes with a surviving human Y  
144 homolog (Skaletsky et al., 2003) as X-Y pairs and also considered the set of X-linked genes with  
145 a surviving Y homolog in any of eight mammals (Bellott et al., 2014) to increase the  
146 phylogenetic breadth of findings regarding X-Y pairs. A number of studies have catalogued the  
147 inactivation status of X-linked genes in various human tissues and cell-types. We used a meta-  
148 analysis that combined results from three studies by assigning a “consensus” X-inactivation  
149 status to each gene (Balaton, Cotton, & Brown, 2015) to designate the remainder of ancestral  
150 genes lacking a Y homolog as subject to or escaping XCI. In summary, we classified genes as  
151 either: 1) X-Y pairs, 2) lacking a Y homolog and subject to XCI (X-inactivated), or 3) lacking a  
152 Y homolog but escaping XCI (X escape).

153 We found that human X-Y pairs have the highest miRNA conservation scores, followed  
154 by X-inactivated and finally X escape genes (Figure 2A,B). The expanded set of X-Y pairs  
155 across eight mammals also has significantly higher miRNA conservation scores than ancestral X-  
156 linked genes with no Y homolog (Supplemental Figure S2). Observed differences between  
157 miRNA conservation scores are not driven by distinct subsets of genes in each class, as indicated  
158 by gene resampling with replacement (Supplemental Figure S3). The decrease in miRNA  
159 conservation scores of X escape genes relative to X-inactivated genes and X-Y pairs is not

160 driven by genes that escape XCI variably across individuals (Supplemental Figure S4), and was  
161 consistent even when including ambiguous genes as either X-inactivated or X escape genes  
162 (Supplemental Figure S5). We also verified that these differences were not driven by artificially  
163 inflated or deflated conservation scores of certain target sites due to non-uniformity in 3' UTR  
164 conservation (Methods, Supplemental Figure S6).

165 Finally, we assessed whether miRNA conservation scores distinguish the three classes by  
166 providing additional information not accounted for by known factors (Bellott et al., 2014)  
167 influencing evolutionary outcomes. We used logistic regression to model, for each gene, the  
168 probability of falling into each of the three classes (X-Y pair, X-inactivated, or X escape) as a  
169 linear combination of haploinsufficiency probability (pHI) (Huang, Lee, Marcotte, & Hurles,  
170 2010), human expression breadth (GTEx Consortium, 2015), purifying selection, measured by  
171 the ratio of non-synonymous to synonymous substitution rates (dN/dS) between human and  
172 mouse orthologs (Yates et al., 2016), and mean gene-level miRNA conservation scores. We note  
173 that pHI is a score composed of several genic features, one of which is the number of protein-  
174 protein interactions, consistent with the idea that members of large protein complexes tend to be  
175 dosage-sensitive (Papp, Pal, & Hurst, 2003; Pessia et al., 2012). Removing either miRNA  
176 conservation or pHI as predictors from the full model resulted in inferior model fits as measured  
177 by Aikake's information criterion (AIC) (full model, AIC 321.5; full model minus miRNA  
178 conservation, AIC 327.7; full model minus pHI, AIC 327.3; higher AIC indicates inferior model).  
179 Therefore, miRNA conservation and pHI contribute independent information that distinguishes  
180 the 3 classes of X-linked genes. Based on our analyses of autosomal copy number variation  
181 (Figure 1), we attribute this independence to the fact that miRNA conservation scores are most  
182 informative with regards to sensitivity to dosage increases. Taken together, these results indicate



183 significant heterogeneity in dosage sensitivity, as inferred by miRNA target site conservation,  
184 among the three classes of ancestral X-linked genes: X-Y pairs are the most dosage-sensitive,  
185 while X-inactivated genes are of intermediate dosage sensitivity, and X escape genes are the  
186 least dosage-sensitive.

187

### 188 **Heterogeneities in X-linked miRNA targeting were present on the ancestral autosomes**

189 We next asked whether differences in miRNA targeting were present on the ancestral autosomes  
190 that gave rise to the mammalian X and Y chromosomes. To reconstruct the ancestral state of  
191 miRNA targeting, we first focused on miRNA target sites in the 3' UTR of human orthologs that  
192 align with perfect identity to a site in the corresponding chicken ortholog; these sites were likely  
193 present in the common ancestor of mammals and birds (Figure 3A,B). We found that X-Y pairs  
194 have the most human-chicken conserved target sites, followed by X-inactivated genes, and then  
195 X escape genes (Figure 3C, top). Unlike the miRNA conservation scores used earlier, this metric  
196 does not account for background conservation; we therefore estimated the background  
197 conservation of each 3' UTR using shuffled miRNA family seed sequences (see Methods). X-Y  
198 pairs, X-inactivated genes, and X escape genes do differ significantly with respect to background  
199 conservation (data not shown), but these differences cannot account for the observed differences  
200 in true human-chicken conserved sites (Figure 3C, bottom). We observed similar results for the  
201 expanded set of X-Y pairs across 8 mammals (Supplemental Figure S7A).

202 Differences in the number of human-chicken conserved sites among the three classes of  
203 X-linked genes could be explained by heterogeneity in miRNA targeting present on the ancestral  
204 autosomes, or by ancestral homogeneity followed by different rates of target site loss during or  
205 following X-Y differentiation. To distinguish between these two possibilities, we took advantage

206 of previous reconstructions of human sex chromosome evolution (Figure 3A) (Bellott et al.,  
207 2014), which confirmed that, following the divergence of placental mammals from marsupials,  
208 an X-autosome chromosomal fusion generated the X-added region (XAR) (Watson, Spencer,  
209 Riggs, & Graves, 1990). Genes on the XAR are therefore X-linked in placental mammals, but  
210 autosomal in marsupials such as the opossum. We limited our analysis to genes in the XAR and  
211 target sites conserved between orthologous chicken and opossum 3' UTRs, ignoring site  
212 conservation in humans; these sites were likely present in the common ancestor of mammals and  
213 birds, and an absence of such sites cannot be explained by site loss following X-Y differentiation.  
214 We observed the same pattern as with the human-chicken conserved sites, both before and after  
215 accounting for background 3' UTR conservation (Figure 3D, three gene classes; Supplemental  
216 Figure S7B, X-Y pairs across 8 mammals). These results demonstrate that the autosomal  
217 precursors of X-Y pairs and X-inactivated genes were subject to more miRNA-mediated  
218 regulation than X escape genes. Combined with our earlier results, we conclude that present-day  
219 heterogeneities in dosage sensitivity on the mammalian X chromosome existed on the ancestral  
220 autosomes from which it derived.

221

### 222 **Z-W pairs have higher miRNA conservation scores than other ancestral Z-linked genes**

223 We next assessed whether classes of avian Z-linked genes, those with and without a W homolog,  
224 show analogous heterogeneities in sensitivity to dosage increases. We used the set of ancestral  
225 genes reconstructed through cross-species comparisons of the avian Z chromosome and  
226 orthologous human autosomes and focused on the set of Z-W pairs identified by sequencing of  
227 the chicken W chromosome (Bellott et al., 2017, 2010). To increase the phylogenetic breadth of  
228 our comparisons, we also included candidate Z-W pairs obtained through comparisons of male

229 and female genome assemblies (4 species set) or inferred by read-depth changes in female  
230 genome assemblies (14 species set, see Methods for details) (Zhou et al., 2014). The more  
231 complete 3' UTR annotations in the human genome relative to chicken allow for a more accurate  
232 assessment of conserved miRNA targeting. Accordingly, we analyzed the 3' UTRs of the human  
233 orthologs of chicken Z-linked genes.

234 We found that the human orthologs of Z-W pairs have higher miRNA conservation  
235 scores than the human orthologs of other ancestral Z genes (Figure 4A, B). Differences in  
236 miRNA conservation scores between Z-W pairs and other ancestral Z genes remained significant  
237 when considering the expanded sets of Z-W pairs across four and 14 avian species  
238 (Supplemental Figure S8). These differences are not driven by distinct subsets of genes, as  
239 indicated by gene resampling with replacement (Supplemental Figure S9), and cannot be  
240 accounted for by within-UTR variation in regional conservation (Supplemental Figure S10).  
241 Logistic regression models indicate that miRNA conservation scores provide additional  
242 information not captured by known factors (Bellott et al., 2017) influencing survival of W-linked  
243 genes (full model model, AIC 127.1; full model minus miRNA conservation, AIC 137.8; full  
244 model minus pHI 132.7; higher AIC indicates inferior model). Together, these results indicate  
245 that Z-linked genes with a surviving W homolog are more sensitive to changes in dosage -- both  
246 increases and decreases -- than are genes without a surviving W homolog.

247 While there are two clear classes of Z-linked genes -- those with or without a W homolog  
248 -- studies of Z-linked gene expression have suggested additional heterogeneity among Z-linked  
249 genes without a W homolog due to gene-specific dosage compensation (Mank & Ellegren, 2009;  
250 Uebbing et al., 2015; Zimmer et al., 2016). If Z-linked genes with no W homolog exist upon a  
251 continuum from non-compensated to dosage-compensated, those that are more compensated

252 should have more conserved miRNA target sites, reflective of greater dosage sensitivity. We  
253 quantified the dosage compensation by using RNA sequencing data (Marin et al., 2017) to  
254 compare, in 4 somatic tissues, the chicken male/female expression ratio to the analogous ratio in  
255 human and anolis (see Methods). In the brain, kidney, and liver, Z-linked genes with no W  
256 homolog and higher mean miRNA conservation scores had male/female expression ratios closer  
257 to 1 (Supplemental Figure S11). Thus, in addition to the above-described differences between Z-  
258 linked genes with or without a W homolog, Z-linked genes with no W homolog but with more  
259 effective dosage compensation have more conserved miRNA target sites than non-compensated  
260 genes.

261

### 262 **Heterogeneities in Z-linked miRNA targeting were present on the ancestral autosomes**

263 We next asked whether differences in miRNA targeting between Z-W pairs and other ancestral  
264 Z-linked genes were present on the ancestral autosomes that gave rise to the avian Z and W  
265 chromosomes. We found that chicken Z-W pairs have more human-chicken-conserved miRNA  
266 target sites than their Z-linked counterparts without surviving W homologs, both before (Figure  
267 5C, top) and after (Figure 5C, bottom) accounting for the background conservation of each  
268 individual 3' UTR. To confirm that these differences represent ancestral heterogeneity rather  
269 than differential site loss during or following Z-W differentiation, we instead considered the  
270 number of sites conserved between human and anolis lizard, which diverged from birds prior to  
271 Z-W differentiation (Figure 5A). Chicken Z-W pairs contain an excess of human-anolis  
272 conserved miRNA target sites, both before (Figure 5D, top) and after (Figure 5D, bottom)  
273 accounting for the background conservation of each individual 3' UTR. We observed similar  
274 results with the predicted four-species (Supplemental Figure S12) and 14-species (Supplemental

275 Figure S13) sets of Z-W pairs. Thus, the autosomal precursors of avian Z-W pairs were subject  
276 to more miRNA-mediated regulation than the autosomal precursors of Z-linked genes that lack a  
277 W homolog. Furthermore, in the liver and brain, Z-linked genes with no W homolog with an  
278 excess of human-chicken-conserved miRNA sites had male/female expression ratios closer to 1,  
279 implying more effective dosage compensation (Supplementary Figure S14). Together, these  
280 results indicate heterogeneity in dosage sensitivity among genes on the ancestral autosomes that  
281 gave rise to the avian Z chromosome.

282

### 283 **Analyses of experimental datasets validate miRNA target site function**

284 Our results to this point, which indicate preexisting heterogeneities in dosage constraints among  
285 X- or Z-linked genes as inferred by predicted miRNA target sites, lead to predictions regarding  
286 the function of these sites in vivo. To test these predictions, we turned to publically available  
287 experimental datasets consisting both of gene expression profiling following transfection or  
288 knockout of individual miRNAs, and of high-throughput crosslinking-immunoprecipitation  
289 (CLIP) to identify sites that bind Argonaute in vivo (see Methods). If the above-studied sites are  
290 effective in mediating target repression, targets of an individual miRNA should show increased  
291 expression levels or Argonaute binding following miRNA transfection, and decreased expression  
292 levels following miRNA knockout. Together, our analyses of publically available datasets  
293 fulfilled these predictions, validating the function of these sites in multiple cellular contexts and  
294 species (Figure 6). From the gene expression profiling data, we observed results consistent with  
295 effective targeting by a) eleven different miRNA families in human HeLa cells (Supplemental  
296 Figure S15), b) four different miRNAs in human HCT116 and HEK293 cells (Supplemental  
297 Figure S16), and c) miR-155 in mouse B and Th1 cells (Supplemental Figure S17). In the CLIP

298 data, the human orthologs of X- or Z-linked targets of miR-124 are enriched for Argonaute-  
299 bound clusters that appear following miR-124 transfection, while a similar but non-significant  
300 enrichment is observed for miR-7 (Supplemental Figure S18). Thus, conserved miRNA target  
301 sites used to infer dosage constraints on X-linked genes and the autosomal orthologs of Z-linked  
302 genes can effectively mediate target repression in living cells.

303

## 304 **DISCUSSION**

305 Here, through the evolutionary reconstruction of microRNA (miRNA) target sites, we provide  
306 evidence for preexisting heterogeneities in dosage sensitivity among genes on the mammalian X  
307 and avian Z chromosomes. We first showed that, across all human autosomal genes, dosage  
308 sensitivity -- as indicated by patterns of genic copy number variation -- correlates with the degree  
309 of conserved miRNA targeting. We found that conserved targeting correlates especially strongly  
310 with sensitivity to dosage increases, consistent with miRNA targeting serving to reduce gene  
311 expression. Turning to the sex chromosomes of mammals and birds, genes that retained a  
312 homolog on the sex-specific Y or W chromosome (X-Y and Z-W pairs) have more conserved  
313 miRNA target sites than genes with no Y or W homolog. In mammals, genes with no Y homolog  
314 that became subject to XCI have more conserved sites than those that continued to escape XCI  
315 following Y gene decay. In birds, across Z-linked genes with no W homolog, the degree of  
316 conserved miRNA targeting correlates with the degree of gene-specific dosage compensation.  
317 We then reconstructed the ancestral state of miRNA targeting, observing significant  
318 heterogeneities in the extent of miRNA targeting, and thus dosage sensitivity, on the ancestral  
319 autosomes that gave rise to the mammalian and avian sex chromosomes. Finally, through  
320 analysis of publically available experimental datasets, we validated the function, in living cells,

321 of the miRNA target sites used to infer dosage sensitivity. We thus conclude that differences in  
322 dosage sensitivity – both to increases and to decreases in gene dosage -- among genes on the  
323 ancestral autosomes influenced their evolutionary trajectory during sex chromosome evolution,  
324 not only on the sex-specific Y and W chromosomes, but also on the sex-shared X and Z  
325 chromosomes.

326 Our findings build upon previous work in three important ways. First, our analysis of  
327 miRNA-mediated repression indicates that these heterogeneities consist of sensitivities to dosage  
328 increases and decreases, whereas previous studies had either focused on sensitivity to  
329 underexpression or could not differentiate the two. Second, our reconstruction of miRNA  
330 targeting on the ancestral autosomes provides direct evidence that heterogeneities in dosage  
331 sensitivity among classes of X- and Z-linked were preexisting rather than acquired during sex  
332 chromosome evolution. Finally, by pointing to specific regulatory sequences (miRNA target  
333 sites) functioning to tune gene dosage both prior to and during sex chromosome evolution, our  
334 study provides a view of dosage compensation encompassing post-transcriptional regulation.

335 Human disease studies support the claim that increased dosage of X-Y pairs and X-  
336 inactivated genes is deleterious to fitness. Copy number gains of the X-linked gene *KDM6A*,  
337 which has a surviving human Y homolog, are found in patients with developmental  
338 abnormalities and intellectual disability (Lindgren et al., 2013). *HDAC6*, *CACNA1F*, *GDI1*, and  
339 *IRS4* all lack Y homologs and are subject to XCI in humans. A mutation in the 3' UTR of  
340 *HDAC6* abolishing targeting by miR-433 has been linked to familial chondrodysplasia in both  
341 sexes (Simon et al., 2010). Likely gain-of-function mutations in *CACNA1F* cause congenital  
342 stationary night blindness in both sexes (Hemara-Wahanui et al., 2005). Copy number changes of  
343 *GDI1* correlate with the severity of X-linked mental retardation in males, with female carriers

344 preferentially inactivating the mutant allele (Vandewalle et al., 2009). Somatic genomic deletions  
345 downstream of *IRS4* lead to its overexpression in lung squamous carcinoma (Weischenfeldt et al.,  
346 2017). Males with partial X disomy due to translocation of the distal long arm of the X  
347 chromosome (Xq28) to the long arm of the Y chromosome show severe mental retardation and  
348 developmental defects (Lahn et al., 1994). Most genes in Xq28 are inactivated in 46,XX females  
349 but escape inactivation in such X;Y translocations, suggesting that increased dosage of Xq28  
350 genes caused the cognitive and developmental defects. We anticipate that further studies will  
351 reveal additional examples of the deleterious effects of increases in gene dosage of X-Y pairs  
352 and X-inactivated genes.

353         We and others previously proposed that Y gene decay drove upregulation of homologous  
354 X-linked genes in both males and females, and that XCI subsequently evolved at genes sensitive  
355 to increased expression from two active X-linked copies in females (Jegalian & Page, 1998;  
356 Ohno, 1967). Our finding that X-inactivated genes have higher miRNA conservation scores than  
357 X escape genes is consistent with this aspect of the model. However, recent studies indicating  
358 heterogeneity in dosage sensitivity between classes of mammalian X- or avian Z-linked genes  
359 (Bellott et al., 2014, 2017; Pessia et al., 2012; Zimmer et al., 2016), combined with the present  
360 finding that these dosage sensitivities existed on the ancestral autosomes, challenge the previous  
361 assumption of a single evolutionary pathway for all sex-linked genes.

362         We therefore propose a revised model of X-Y and Z-W evolution in which the ancestral  
363 autosomes that gave rise to the mammalian and avian sex chromosomes contained three (or two,  
364 in the case of birds) classes of genes with differing dosage sensitivities (Figure 7A,B). For  
365 ancestral genes with high dosage sensitivity, Y or W gene decay would have been highly  
366 deleterious, and thus the Y- or W-linked genes were retained. According to our model, these



367 genes' high dosage sensitivity also precluded upregulation of the X- or Z-linked homolog, and,  
368 in mammals, subsequent X-inactivation; indeed, their X-linked homologs continue to escape  
369 XCI (Bellott et al., 2014). For ancestral mammalian genes of intermediate dosage sensitivity, Y  
370 gene decay did occur, and was accompanied or followed by compensatory upregulation of the X-  
371 linked homolog in both sexes; the resultant increased expression in females was deleterious and  
372 led to the acquisition of XCI. Ancestral mammalian genes of low dosage sensitivity continued to  
373 escape XCI following Y decay; heterogeneity in X upregulation may further subdivide such  
374 genes (Figure 6A). These genes' dosage insensitivity set them apart biologically, and  
375 evolutionarily, from the other class of X-linked genes escaping XCI -- those with a surviving Y  
376 homolog.

377 Our revised model relates preexisting, gene-by-gene heterogeneities in dosage sensitivity  
378 to the outcomes of sex chromosome evolution. However, the suppression of X-Y recombination  
379 did not occur on a gene-by-gene basis, instead initiating Y gene decay and subsequent dosage  
380 compensation through a series of large-scale inversions encompassing many genes (Lahn & Page,  
381 1999). The timings and boundaries of these evolutionary strata varied among mammalian  
382 lineages, thus leading to unique chromosome-scale evolutionary dynamics across mammals.  
383 These large-scale changes would have then allowed for genic selection to take place according to  
384 the preexisting dosage sensitivities outlined above. In this way, the course of sex chromosome  
385 evolution in mammals is a composite of 1) preexisting, gene-by-gene dosage sensitivities and 2)  
386 the manner in which the history of the X and Y unfolded in particular lineages via discrete, large-  
387 scale inversions.

388 In this study, we have focused on classes of ancestral X-linked genes delineated by the  
389 survival of a human Y homolog or by the acquisition of XCI in humans, but such evolutionary

390 states can differ among mammalian lineages and species. In mouse, for instance, both Y gene  
391 decay (Bellott et al., 2014) and the acquisition of X-inactivation (Yang et al., 2010) are more  
392 complete than in humans or other mammals, as exemplified by *RPS4X*, which retains a Y  
393 homolog and continues to escape XCI in primates, but has lost its Y homolog and is subject to  
394 XCI in rodents. These observations could be explained by shortened generation times in the  
395 rodent lineage, resulting in longer evolutionary times, during which the forces leading to Y gene  
396 decay and the acquisition of X-inactivation could act (Charlesworth & Crow, 1978; Jegalian &  
397 Page, 1998; Ohno, 1967). Another case of lineage differences involves *HUWE1*, which lacks a Y  
398 homolog and is subject to XCI in both human and mouse, but retains a functional Y homolog in  
399 marsupials, where it continues to escape XCI. In the future, more complete catalogues of X-  
400 inactivation and escape in additional mammalian lineages would make it possible to examine  
401 whether analogous, preexisting dosage sensitivities differentiate the three classes of X-linked  
402 genes (X-Y pairs, X-inactivated genes, and X escape genes) in other species.

403         Previous studies have sought evidence of X-linked upregulation during mammalian sex  
404 chromosome evolution using comparisons of gene expression levels between the whole of the X  
405 chromosome and all of the autosomes, with equal numbers of studies rejecting or finding  
406 evidence consistent with upregulation (Deng et al., 2011; Julien et al., 2012; Kharchenko, Xi, &  
407 Park, 2011; Lin, Xing, Zhang, & He, 2012; Xiong et al., 2010). This is likely due to gene-by-  
408 gene heterogeneity in dosage sensitivities that resulted in a stronger signature of upregulation at  
409 more dosage sensitive genes (Pessia et al., 2012). Similarly, studies of Z-linked gene expression  
410 in birds provide evidence for the gene-by-gene nature of Z dosage compensation, as measured by  
411 comparisons of gene expression levels between ZZ males and ZW females (Itoh et al., 2007;  
412 Mank & Ellegren, 2009; Uebbing et al., 2015), and indicate a stronger signature of dosage

413 compensation at predicted dosage-sensitive genes (Zimmer et al., 2016). By showing that such  
414 dosage sensitivities existed on the ancestral autosomes and consist of sensitivity to both increases  
415 and decreases, our findings highlight an additional aspect of dosage compensation that affects  
416 both birds and mammals.

417 In addition to revealing similarities between mammals and birds, our study provides a  
418 view of dosage compensation that highlights post-transcriptional regulatory mechanisms,  
419 pointing to specific non-coding sequences with known mechanisms (microRNA target sites)  
420 functioning across evolutionary time. A recent study in birds showed a role for a Z-linked  
421 miRNA, miR-2954-3p, in dosage compensation of some Z-linked genes (Warnefors et al., 2017).  
422 Our study suggests an additional, broader role for miRNA targeting, with hundreds of different  
423 miRNAs acting to tune gene dosage both before and during sex chromosome evolution.  
424 Furthermore, our finding of greater conserved miRNA targeting of X-inactivated genes relative  
425 to X escape genes shows that it is possible to predict the acquisition of a transcriptional  
426 regulatory state (XCI) during sex chromosome evolution on the basis of a preexisting, post-  
427 transcriptional regulatory state. Perhaps additional post-transcriptional regulatory mechanisms  
428 and their associated regulatory elements will be shown to play roles in mammalian and avian  
429 dosage compensation.

430 Recent work has revealed that the sex-specific chromosome -- the Y in mammals and the  
431 W in birds -- convergently retained dosage-sensitive genes with important regulatory functions  
432 (Bellott et al., 2014, 2017). Our study, by reconstructing the ancestral state of post-transcriptional  
433 regulation, provides direct evidence that such heterogeneity in dosage sensitivity existed on the  
434 ancestral autosomes that gave rise to the mammalian and avian sex chromosomes. This  
435 heterogeneity influenced both survival on the sex-specific chromosomes in mammals and birds

436 and the evolution of XCI in mammals. Thus, two independent experiments of nature offer  
437 empirical evidence that modern-day amniote sex chromosomes were shaped, during evolution,  
438 by the properties of the ancestral autosomes from which they derive.

## 439 **METHODS**

### 440 **Statistics**

441 Details of all statistical tests (type of test, test statistic, and p-value) used in this manuscript are  
442 provided in Supplemental Table S1.

443

### 444 **Human genic copy number variation**

445 To annotate gene deletions and duplications, we used data from the Exome Aggregation  
446 Consortium (ExAC) ([ftp://ftp.broadinstitute.org/pub/ExAC\\_release/release0.3.1/cnv/](ftp://ftp.broadinstitute.org/pub/ExAC_release/release0.3.1/cnv/)), which  
447 consists of autosomal genic duplications and deletions (both full and partial) called in 59,898  
448 exomes (Ruderfer et al., 2016). Further details are provided in Supplemental Methods in the  
449 section titled ‘Human genic copy number variation’. These gene assignments are provided in  
450 Supplemental Table S2.

451

### 452 **X- and Z-linked gene sets**

453 We utilized our previous reconstructions of the ancestral mammalian X (Bellott et al., 2014) and  
454 avian Z (Bellott et al., 2017) chromosomes, as well as information on multicopy and ampliconic  
455 X-linked genes (Mueller et al., 2013) and XCI status in humans (Balaton et al., 2015) to  
456 delineate classes of X- and Z-linked genes. Further details are provided in Supplemental  
457 Methods under the sections titled ‘X-linked gene sets’ and ‘Z-linked gene sets’. Information on  
458 X-linked genes is provided in Supplemental Table S3. Information on Z-linked genes is provided  
459 in Supplemental Table S4.

460

### 461 **microRNA target sites**

462 Pre-calculated  $P_{CT}$  scores for all gene-miRNA family interactions  
463 ([http://www.targetscan.org/vert\\_71/vert\\_71\\_data\\_download/Summary\\_Counts.all\\_predictions.txt.zip](http://www.targetscan.org/vert_71/vert_71_data_download/Summary_Counts.all_predictions.txt.zip)) and site-wise alignment information  
464 ([http://www.targetscan.org/vert\\_71/vert\\_71\\_data\\_download/Conserved\\_Family\\_Info.txt.zip](http://www.targetscan.org/vert_71/vert_71_data_download/Conserved_Family_Info.txt.zip))  
465 were obtained from TargetScan Human v7. Details on the filtering of miRNAs and resampling-  
466 based assessment of  $P_{CT}$  scores are provided in Supplemental Methods in the section titled  
467 ‘microRNA target site  $P_{CT}$  scores’. Details regarding analysis of human-chicken or human-anolis  
468 conserved sites, as well as approaches to control for background conservation, are provided in  
469 Supplemental Methods in the section titled ‘Human-chicken conserved microRNA target sites.’  
470  
471

#### 472 **Variation in within-UTR conservation bias**

473 To address the possibility that non-uniformity in regional 3` UTR conservation could artificially  
474 inflate or deflate conservation scores of certain target sites, we implemented a step-detection  
475 algorithm to segment 3` UTRs into regions of homogeneous background conservation and  
476 calculated miRNA site conservation relative to these smaller regions. These regionally  
477 normalized scores, corresponding to all gene-miRNA interactions, are provided in Supplemental  
478 Table S5. Details of the step-detection algorithm are provided in Supplemental Methods in the  
479 section titled ‘Variation in within-UTR conservation bias’.

480

#### 481 **Logistic regression**

482 Logistic regression models were constructed using the function ‘multinom’ in the R package  
483 ‘nnet.’ We used previously published values for known factors in the survival of Y-linked  
484 (Bellott et al., 2014) and W-linked (Bellott et al., 2017) genes except for human expression

485 breadth, which we recalculated using data from the GTEx Consortium v6 data release  
486 (Consortium, 2015). Briefly, kallisto was used to estimate transcript per million (TPM) values in  
487 the 10 male samples with the highest RNA integrity numbers (RINs) from each of 37 tissues, and  
488 expression breadth across tissues was calculated as described in (Bellott et al., 2014), using  
489 median TPM values for each tissue.

490

#### 491 **Assessing Z-linked dosage compensation using cross-species RNA-sequencing data**

492 Raw data from Marin et al 2017 (add citation) was obtained, and kallisto and limma/voom were  
493 used for abundance quantification and differential expression, respectively. Further details are  
494 provided in Supplemental Methods in the section titled ‘Assessing Z-linked dosage  
495 compensation using cross-species RNA-sequencing data’.

496

#### 497 **Gene expression profiling and crosslinking datasets**

498 Fold-changes in mRNA expression and targets of Argonaute as determined by high-throughput  
499 crosslinking-immunoprecipitation (CLIP) were obtained from a variety of publically available  
500 datasets. Further details are provided in Supplemental Methods in the section titled ‘Gene  
501 expression profiling and crosslinking datasets.’ All fold-changes and CLIP targets are provided  
502 in Supplemental Table S6.

503

#### 504 **Code availability**

505 A custom Python (RRID:SCR\_008394) script utilizing Biopython (RRID:SCR\_007173) was  
506 used to generate shuffled miRNA family seed sequences. Identification of miRNA target site  
507 matches using shuffled seed sequences was performed using the ‘targetscan\_70.pl’ perl script

508 ([http://www.targetscan.org/vert\\_71/vert\\_71\\_data\\_download/targetscan\\_70.zip](http://www.targetscan.org/vert_71/vert_71_data_download/targetscan_70.zip)). 3` UTR  
509 segmentation was performed with the 'plot\_transitions.py' python script. Code is available at:  
510 <https://github.com/snaqvi1990/Naqvi17-code> and as Supplementary Code.

511

## 512 **Data access**

513 Data supporting the findings of this study are available within the paper and its Supplemental  
514 information files. Accession numbers for publically available datasets are provided when  
515 appropriate in Methods sections.

516

## 517 **ACKNOWLEDGEMENTS**

518 We thank V. Agarwal, S. Eichorn, S. McGeary, and D. Bartel for assistance with the TargetScan  
519 database and helpful discussions; A. Godfrey for updated human-chicken orthology information;  
520 and A. Godfrey, J. Hughes and H. Skaletsky for critical reading of the manuscript. This work  
521 was supported by the National Institutes of Health and the Howard Hughes Medical Institute.  
522 S.N. was supported under a research grant by Biogen.

523



524 **Author contributions**

525 S.N., D.W.B. and D.C.P designed the study. S.N. performed analyses with assistance from  
526 D.W.B. K.S.L developed and implemented the step-detection algorithm. S.N. and D.C.P wrote  
527 the paper.

528

529

530 **DISCLOSURE DECLARATION**

531 The authors declare no competing financial interests.

- 532 Balaton, B. P., Cotton, A. M., and Brown, C. J. (2015). Derivation of consensus inactivation  
533 status for X-linked genes from genome-wide studies. *Biology of Sex Differences*, 6, 35.  
534 <https://doi.org/10.1186/s13293-015-0053-7>
- 535 Bartel, D. P. (2009). MicroRNAs: target recognition and regulatory functions. *Cell*, 136(2), 215–  
536 233. <https://doi.org/10.1016/j.cell.2009.01.002>
- 537 Bellott, D. W., Hughes, J. F., Skaletsky, H., Brown, L. G., Pyntikova, T., Cho, T.-J., Koutseva,  
538 N., Zaghlul, S., Graves, T., Rock, S., Kremitzki, C., Fulton, R. S., Dugan, S., Ding, Y.,  
539 Morton, D., Khan, Z., Lewis, L., ... Page, D. C. (2014). Mammalian Y chromosomes retain  
540 widely expressed dosage-sensitive regulators. *Nature*, 508(7497), 494–499.  
541 <https://doi.org/10.1038/nature13206>
- 542 Bellott, D. W., Skaletsky, H., Cho, T.-J., Brown, L., Locke, D., Chen, N., Galkina, S., Pyntikova,  
543 T., Koutseva, N., Graves, T., Kremitzki, C., Warren, W. C., Clark, A. G., Gaginskaya, E.,  
544 Wilson, R. K., and Page, D. C. (2017). Avian W and mammalian Y chromosomes  
545 convergently retained dosage-sensitive regulators. *Nature Genetics*, in press.
- 546 Bellott, D. W., Skaletsky, H., Pyntikova, T., Mardis, E. R., Graves, T., Kremitzki, C., Brown, L.  
547 G., Rozen, S., Warren, W. C., Wilson, R. K., and Page, D. C. (2010). Convergent evolution  
548 of chicken Z and human X chromosomes by expansion and gene acquisition. *Nature*,  
549 466(7306), 612–616. <https://doi.org/10.1038/nature09172>
- 550 Berletch, J. B., Ma, W., Yang, F., Shendure, J., Noble, W. S., Disteche, C. M., and Deng, X.  
551 (2015). Escape from X Inactivation Varies in Mouse Tissues. *PLOS Genetics*, 11(3),  
552 e1005079. <https://doi.org/10.1371/journal.pgen.1005079>
- 553 Carrel, L., and Willard, H. F. (2005). X-inactivation profile reveals extensive variability in X-  
554 linked gene expression in females. *Nature*, 434(March), 400–404.  
555 <https://doi.org/10.1038/nature03479>
- 556 Charlesworth, B., and Crow, J. F. (1978). Model for evolution of Y chromosomes and dosage  
557 compensation, 75(11), 5618–5622.
- 558 Consortium, Gt. (2015). The Genotype-Tissue Expression (GTEx) pilot analysis: Multitissue  
559 gene regulation in humans. *Science (New York, N.Y.)*, 348(6235), 648–660.
- 560 Deng, X., Hiatt, J. B., Nguyen, D. K., Ercan, S., Sturgill, D., Hillier, L. W., Schlesinger, F.,  
561 Davis, C. a, Reinke, V. J., Gingeras, T. R., Shendure, J., Waterston, R. H., Oliver, B., Lieb,  
562 J. D., and Disteche, C. M. (2011). Evidence for compensatory upregulation of expressed X-  
563 linked genes in mammals, *Caenorhabditis elegans* and *Drosophila melanogaster*. *Nature*  
564 *Genetics*, 43(12), 1179–1185. <https://doi.org/10.1038/ng.948>
- 565 Friedman, R. C., Farh, K. K.-H., Burge, C. B., and Bartel, D. P. (2009). Most mammalian  
566 mRNAs are conserved targets of microRNAs. *Genome Research*, 19(1), 92–105.  
567 <https://doi.org/10.1101/gr.082701.108>
- 568 Hemara-Wahanui, A., Berjukow, S., Hope, C. I., Dearden, P. K., Wu, S.-B., Wilson-Wheeler, J.,  
569 Sharp, D. M., Lundon-Treweek, P., Clover, G. M., Hoda, J.-C., Striessnig, J., Marksteiner,  
570 R., Hering, S., and Maw, M. a. (2005). A CACNA1F mutation identified in an X-linked  
571 retinal disorder shifts the voltage dependence of Cav1.4 channel activation. *Proceedings of*  
572 *the National Academy of Sciences of the United States of America*, 102(21), 7553–7558.  
573 <https://doi.org/10.1073/pnas.0501907102>
- 574 Huang, N., Lee, I., Marcotte, E. M., and Hurles, M. E. (2010). Characterising and predicting  
575 haploinsufficiency in the human genome. *PLoS Genetics*, 6(10), e1001154.  
576 <https://doi.org/10.1371/journal.pgen.1001154>
- 577 Hughes, J. F., Skaletsky, H., Brown, L. G., Pyntikova, T., Graves, T., Fulton, R. S., Dugan, S.,

- 578 Ding, Y., Buhay, C. J., Kremitzki, C., Wang, Q., Shen, H., Holder, M., Villasana, D.,  
579 Nazareth, L. V., Cree, A., Courtney, L., ... Page, D. C. (2012). Strict evolutionary  
580 conservation followed rapid gene loss on human and rhesus Y chromosomes. *Nature*,  
581 483(7387), 82–86. <https://doi.org/10.1038/nature10843>
- 582 Itoh, Y., Melamed, E., Yang, X., Kampf, K., Wang, S., Yehya, N., Van Nas, A., Replogle, K.,  
583 Band, M. R., Clayton, D. F., Schadt, E. E., Luskis, A. J., and Arnold, A. P. (2007). Dosage  
584 compensation is less effective in birds than in mammals. *Journal of Biology*, 6(1), 2.  
585 <https://doi.org/10.1186/jbiol53>
- 586 Jegalian, K., and Page, D. C. (1998). A proposed path by which genes common to mammalian X  
587 and Y chromosomes evolve to become X inactivated. *Nature*, 394(August), 776–780.  
588 Retrieved from <http://www.nature.com/nature/journal/v394/n6695/abs/394776a0.html>
- 589 Julien, P., Brawand, D., Soumillon, M., Necsulea, A., Liechti, A., Schütz, F., Daish, T., Grützner,  
590 F., and Kaessmann, H. (2012, January). Mechanisms and evolutionary patterns of  
591 mammalian and avian dosage compensation. *PLoS Biology*.  
592 <https://doi.org/10.1371/journal.pbio.1001328>
- 593 Kaiser, V. B., Zhou, Q., and Bachtrog, D. (2011). Nonrandom gene loss from the drosophila  
594 miranda neo-Y chromosome. *Genome Biology and Evolution*, 3, 1329–1337.  
595 <https://doi.org/10.1093/gbe/evr103>
- 596 Kharchenko, P. V., Xi, R., and Park, P. J. (2011). Evidence for dosage compensation between the  
597 X chromosome and autosomes in mammals. *Nature Genetics*, 43(12), 1167–1169.  
598 <https://doi.org/10.1038/ng.991>
- 599 Lahn, B. T., Ma, N., Breg, R. W., Stratton, R., Surti, U., and Page, D. C. (1994). Xq-Yq  
600 interchange resulting in supernormal X-linked gene expression in severely retarded males  
601 with 46,XYq- karyotype. *Nature Genetics*, 8, 362–369. <https://doi.org/10.1038/ng1294-340>
- 602 Lahn, B. T., and Page, D. C. (1999). Four evolutionary strata on the human X chromosome.  
603 *Science*, 286(5441), 964–967. <https://doi.org/10.1126/science.286.5441.964>
- 604 Lin, F., Xing, K., Zhang, J., and He, X. (2012). Expression reduction in mammalian X  
605 chromosome evolution refutes Ohno's hypothesis of dosage compensation. *Proceedings of*  
606 *the National Academy of Sciences*, 109(29), 11752–11757.  
607 <https://doi.org/10.1073/pnas.1201816109>
- 608 Lindgren, A. M., Hoyos, T., Talkowski, M. E., Hanscom, C., Blumenthal, I., Chiang, C., Ernst,  
609 C., Pereira, S., Ordulu, Z., Clericuzio, C., Drautz, J. M., Rosenfeld, J. a, Shaffer, L. G.,  
610 Velsher, L., Pynn, T., Vermeesch, J., Harris, D. J., ... Morton, C. C. (2013).  
611 Haploinsufficiency of KDM6A is associated with severe psychomotor retardation, global  
612 growth restriction, seizures and cleft palate. *Human Genetics*, 132(5), 537–52.  
613 <https://doi.org/10.1007/s00439-013-1263-x>
- 614 Mank, J. E., and Ellegren, H. (2009). All dosage compensation is local: gene-by-gene regulation  
615 of sex-biased expression on the chicken Z chromosome. *Heredity*, 102(3), 312–320.  
616 <https://doi.org/10.1038/hdy.2008.116>
- 617 Marin, R., Cortez, D., Lamanna, F., Pradeepa, M. M., Leushkin, E., Julien, P., Liechti, A.,  
618 Halbert, J., Brüning, T., Mössinger, K., Trefzer, T., Conrad, C., Kerver, H. N., Wade, J.,  
619 Tschopp, P., and Kaessmann, H. (2017). Convergent origination of a Drosophila -like  
620 dosage compensation mechanism in a reptile lineage. *Genome Research*, 1–14.  
621 <https://doi.org/10.1101/gr.223727.117>
- 622 Mueller, J. L., Skaletsky, H., Brown, L. G., Zaghulul, S., Rock, S., Graves, T., Auger, K., Warren,  
623 W. C., Wilson, R. K., and Page, D. C. (2013). Independent specialization of the human and

- 624 mouse X chromosomes for the male germ line. *Nature Genetics*, 45(9), 1083–1087.  
625 <https://doi.org/10.1038/ng.2705>
- 626 Nanda, I., Shan, Z., Scharl, M., Burt, D. W., Koehler, M., Nothwang, H., Grützner, F., Paton, I.  
627 R., Windsor, D., Dunn, I., Engel, W., Staeheli, P., Mizuno, S., Haaf, T., and Schmid, M.  
628 (1999). 300 million years of conserved synteny between chicken Z and human chromosome  
629 9. *Nature Genetics*, 21(march), 258–259. <https://doi.org/10.1038/6769>
- 630 Ohno, S. (1967). *Sex chromosomes and sex-linked genes*. Springer-Verlag.
- 631 Papp, B., Pal, C., and Hurst, L. D. (2003). Dosage sensitivity and the evolution of gene families  
632 in yeast. *Nature*, 424, 194–197. <https://doi.org/10.1038/nature01713.1>.
- 633 Pessia, E., Makino, T., Bailly-Bechet, M., McLysaght, A., and Marais, G. a B. (2012).  
634 Mammalian X chromosome inactivation evolved as a dosage-compensation mechanism for  
635 dosage-sensitive genes on the X chromosome. *Proceedings of the National Academy of*  
636 *Sciences of the United States of America*, 109(14), 5346–51.  
637 <https://doi.org/10.1073/pnas.1116763109>
- 638 Pinzón, N., Li, B., Martinez, L., Sergeeva, A., Presumey, J., Apparailly, F., and Seitz, H. (2016).  
639 The number of biologically relevant microRNA targets has been largely over-estimated The  
640 number of biologically relevant microRNA targets has been largely overestimated,  
641 (November), 1–11. <https://doi.org/10.1101/gr.205146.116>
- 642 Ross, M. T., Grafham, D. V, Coffey, A. J., Scherer, S., McLay, K., Muzny, D., and Platzer, M.  
643 (2005). The DNA sequence of the human X chromosome. *Nature*, 434(March), 325–337.
- 644 Ruderfer, D. M., Hamamsy, T., Lek, M., Karczewski, K. J., Kavanagh, D., Samocha, K. E.,  
645 Exome Aggregation Consortium, Daly, M. J., MacArthur, D. G., Fromer, M., and Purcell, S.  
646 M. (2016). Patterns of genic intolerance of rare copy number variation in 59,898 human  
647 exomes. *Nature Genetics*, 48(10), 1107–1111. <https://doi.org/10.1038/ng.3638>
- 648 Simon, D., Laloo, B., Barillot, M., Barnetche, T., Blanchard, C., Rooryck, C., Marche, M.,  
649 Burgelin, I., Coupry, I., Chassaing, N., Gilbert-Dussardier, B., Lacombe, D., Grosset, C.,  
650 and Arveiler, B. (2010). A mutation in the 3'-UTR of the HDAC6 gene abolishing the post-  
651 transcriptional regulation mediated by hsa-miR-433 is linked to a new form of dominant X-  
652 linked chondrodysplasia. *Human Molecular Genetics*, 19(10), 2015–2027.  
653 <https://doi.org/10.1093/hmg/ddq083>
- 654 Skaletsky, H., Kuroda-kawaguchi, T., Minx, P. J., Cordum, H. S., Hillier, L., Brown, L. G.,  
655 Repping, S., Pyntikova, T., Ali, J., Bieri, T., Chinwalla, A., Delehaunty, A., Delehaunty, K.,  
656 Du, H., Fewell, G., Fulton, L., Fulton, R., ... Page, D. C. (2003). The male-specific region  
657 of the human Y chromosome is a mosaic of discrete sequence classes. *Nature*, 423, 825–  
658 838.
- 659 Tukiainen, T., Villani, A.-C., Yen, A., Rivas, M. A., Marshall, J. L., Satija, R., Aguirre, M.,  
660 Gauthier, L., Fleharty, M., Kirby, A., Cummings, B. B., Castel, S. E., Karczewski, K. J.,  
661 Aguet, F., Byrnes, A., Aguet, F., Ardlie, K. G., ... MacArthur, D. G. (2017). Landscape of  
662 X chromosome inactivation across human tissues. *Nature*, 550(7675), 244–248.  
663 <https://doi.org/10.1038/nature24265>
- 664 Uebbing, S., Konzer, A., Xu, L., Backström, N., Brunström, B., Bergquist, J., and Ellegren, H.  
665 (2015). Quantitative mass spectrometry reveals partial translational regulation for dosage  
666 compensation in chicken. *Molecular Biology and Evolution*, 32(10), 2716–2725.  
667 <https://doi.org/10.1093/molbev/msv147>
- 668 Vandewalle, J., Van Esch, H., Govaerts, K., Verbeeck, J., Zweier, C., Madrigal, I., Mila, M.,  
669 Pijkels, E., Fernandez, I., Kohlhase, J., Spaich, C., Rauch, A., Fryns, J. P., Marynen, P., and

- 670 Froyen, G. (2009). Dosage-dependent severity of the phenotype in patients with mental  
671 retardation due to a recurrent copy-number gain at Xq28 mediated by an unusual  
672 recombination. *American Journal of Human Genetics*, 85(6), 809–822.  
673 <https://doi.org/10.1016/j.ajhg.2009.10.019>
- 674 Warnefors, M., Mossinger, K., Halbert, J., Studer, T., VandeBerg, J. L., Lindgren, I.,  
675 Fallahshahroudi, A., Jensen, P., and Kaessmann, H. (2017). Sex-biased microRNA  
676 expression in mammals and birds reveals underlying regulatory mechanisms and a role in  
677 dosage compensation. *Genome Research*, 1–13. <https://doi.org/10.1101/gr.225391.117>
- 678 Watson, J. M., Spencer, J. A., Riggs, A. D., and Graves, J. A. (1990). The X chromosome of  
679 monotremes shares a highly conserved region with the eutherian and marsupial X  
680 chromosomes despite the absence of X chromosome inactivation. *Proceedings of the  
681 National Academy of Sciences*, 87(18), 7125–7129. <https://doi.org/10.1073/pnas.87.18.7125>
- 682 Weischenfeldt, J., Dubash, T., Drainas, A. P., Mardin, B. R., Chen, Y., Stütz, A. M., Waszak, S.  
683 M., Bosco, G., Halvorsen, A. R., Raeder, B., Efthymiopoulos, T., Erkek, S., Siegl, C.,  
684 Brenner, H., Brustugun, O. T., Dieter, S. M., Northcott, P. A., ... Korbel, J. O. (2017). Pan-  
685 cancer analysis of somatic copy-number alterations implicates IRS4 and IGF2 in enhancer  
686 hijacking. *Nature Genetics*, 49, 65–74. <https://doi.org/10.1038/ng.3722>
- 687 White, M. a, Kitano, J., and Peichel, C. L. (2015). Purifying Selection Maintains Dosage-  
688 Sensitive Genes during Degeneration of the Threespine Stickleback Y Chromosome.  
689 *Molecular Biology and Evolution*, 32(8), 1981–1995.  
690 <https://doi.org/10.1093/molbev/msv078>
- 691 Xiong, Y., Chen, X., Chen, Z., Wang, X., Shi, S., Wang, X., Zhang, J., and He, X. (2010). RNA  
692 sequencing shows no dosage compensation of the active X-chromosome. *Nature Genetics*,  
693 42(12), 1043–1047. <https://doi.org/10.1038/ng.711>
- 694 Yang, F., Babak, T., Shendure, J., and Disteché, C. M. (2010). Global survey of escape from X  
695 inactivation by RNA-sequencing in mouse. *Genome Research*, 20(5), 614–622.  
696 <https://doi.org/10.1101/gr.103200.109>
- 697 Yates, A., Akanni, W., Amode, M. R., Barrell, D., Billis, K., Carvalho-Silva, D., Cummins, C.,  
698 Clapham, P., Fitzgerald, S., Gil, L., Girón, C. G., Gordon, L., Hourlier, T., Hunt, S. E.,  
699 Janacek, S. H., Johnson, N., Juettemann, T., ... Flicek, P. (2016). Ensembl 2016. *Nucleic  
700 Acids Research*, 44(D1), D710–D716. <https://doi.org/10.1093/nar/gkv1157>
- 701 Zhou, Q., Zhang, J., Bachtrog, D., An, N., Huang, Q., Jarvis, E. D., Gilbert, M. T. P., and Zhang,  
702 G. (2014). Complex evolutionary trajectories of sex chromosomes across bird taxa. *Science*,  
703 346(6215), 1246338. <https://doi.org/10.1126/science.1246338>
- 704 Zimmer, F., Harrison, P. W., Dessimoz, C., and Mank, J. E. (2016). Compensation of Dosage-  
705 Sensitive Genes on the Chicken Z Chromosome. *Genome Biology and Evolution*, 8(4),  
706 1233–1242. <https://doi.org/10.1093/gbe/evw075>
- 707

1 **Figure 1: Conserved miRNA targeting of autosomal genes stratified by copy number**  
2 **variation in 59,898 human exomes.** Probabilities of conserved targeting ( $P_{CT}$ ) of all gene-  
3 miRNA interactions involving non-duplicated and duplicated genes, further stratified as (A)  
4 deleted (grey,  $n = 69,339$  interactions from 4,118 genes; blue,  $n = 80,290$  interactions from 3,976  
5 genes) or (B) not deleted (orange,  $n = 51,514$  interactions from 2,916 genes; purple,  $n = 72,826$   
6 interactions from 3,510 genes). \*\*\*  $p < 0.001$ , two-sided Kolmogorov-Smirnov test. (C) Mean  
7 gene-level  $P_{CT}$  scores. \*\*  $p < 0.01$ , \*\*\*  $p < 0.001$ , two-sided Wilcoxon rank-sum test.

8  
9 **Figure 2. X-Y pairs and X-inactivated genes have higher miRNA conservation scores than**  
10 **X escape genes.**  $P_{CT}$  score distributions of all gene-miRNA interactions involving (A) human X-  
11 Y pairs ( $n = 371$  interactions from 15 genes), X-inactivated genes ( $n = 6,743$  interactions from  
12 329 genes), and X escape genes ( $n = 1,037$  interactions from 56 genes). \*\*  $p < 0.01$ , two-sided  
13 Kolmogorov-Smirnov test. (B) Mean gene-level  $P_{CT}$  scores. \*  $p < 0.05$ , \*\*  $p < 0.01$ , two-sided  
14 Wilcoxon rank-sum test.

15  
16 **Figure 3. Heterogeneities in X-linked miRNA targeting were present on the ancestral**  
17 **autosomes.** (A) Example reconstruction of an ancestral miR-96 target site in the 3' UTR of  
18 KDM6A, an X-linked gene in the X-added region (XAR) with a surviving Y homolog. Dots in  
19 non-human species indicate identity with the human sequence, dashes gaps indicate gaps in the  
20 multiple sequence alignment. (B) Distributions of sites conserved between 3' UTRs of human  
21 and chicken orthologs (top) or comparisons to background expectation (bottom, see Methods) for  
22 human X-Y pairs ( $n = 16$ ), X-inactivated genes ( $n = 251$ ), and X escape genes ( $n = 42$ ). (C)

23 Statistics as in (B), but using sites conserved between chicken and opossum 3` UTRs only for  
24 genes in the XAR; X-Y pairs (n = 11), X-inactivated genes (n = 58), and X escape genes (n = 27).

25

26 **Figure 4. Z-W pairs have higher miRNA conservation scores than other ancestral Z-linked**

27 **genes.** P<sub>CT</sub> score distributions of all gene-miRNA interactions involving the human orthologs of

28 (A) chicken Z-W pairs (n = 832 interactions from 28 genes) and other ancestral Z genes (n =

29 16,692 interactions from 657 genes). \*\*\* p < 0.001, two-sided Kolmogorov-Smirnov test. (B)

30 Mean gene-level P<sub>CT</sub> scores. \*\*\* p < 0.001, two-sided Wilcoxon rank-sum test.

31

32 **Figure 5. Heterogeneities in Z-linked miRNA targeting were present on the ancestral**

33 **autosomes.** (A) Example reconstruction of an ancestral miR-145 target site in the 3` UTR of

34 RASA1, a Z-linked gene with a surviving W homolog. Example of 3` UTR sequence alignment

35 for RASA1, a Z-linked gene with a surviving W homolog, with a target site for miR-145

36 highlighted in gray. (B) Numbers of sites conserved between 3` UTRs of human and chicken

37 orthologs (top) or comparisons to background expectation (bottom) for chicken Z-W pairs (n =

38 27) and other ancestral Z genes (n = 578). (C) Statistics as in (B), but using sites conserved

39 between human and anolis 3` UTRs.

40

41 **Figure 6. Analyses of experimental datasets validate miRNA target site function.** Responses

42 to transfection (A,B,C) or knockout (D) of indicated miRNAs in human (A,B,C) or mouse (D)

43 cell-types. Each panel depicts corresponding changes in mRNA levels (A,B), in fraction of

44 Argonaute-bound genes (C), and in mRNA stability and translational efficiency as measured by

45 ribosome protected fragments (RPF, D). In each case, X-linked genes and the human orthologs

46 of Z-linked genes containing target sites with an assigned  $P_{CT}$  score (red) for the indicated  
47 miRNA were compared to all expressed genes lacking target sites (black); gene numbers are  
48 indicated in parentheses. (A,B,D) \*\*\*  $p < 0.001$ , two-sided Kolmogorov-Smirnov test. (C) \*  $p <$   
49 0.05, two-sided Fisher's exact test.

50

51 **Figure 7. An evidence-based model of preexisting heterogeneities in dosage sensitivity**

52 **shaping mammalian and avian sex chromosome evolution.** In this model, preexisting

53 heterogeneities in dosage sensitivity determined the trajectory of Y/W gene loss in both

54 mammals and birds, and of subsequent X-inactivation in mammals and dosage compensation in

55 birds. Colored arrow widths are scaled approximately to the number of ancestral genes in each

56 class. (A) The dashed orange line represents the possibility that a subset of X-linked genes may

57 have not undergone compensatory X upregulation following Y gene decay. (B) Ancestral Z

58 genes with no W homolog follow a gradient of preexisting dosage sensitivity (top, grey to white),

59 which determined the degree of dosage compensation following W gene loss (bottom).

60

61 **Supplemental Figure S1: Effect of deletion status on autosomal  $P_{CT}$  scores.** Probabilities of

62 conserved targeting ( $P_{CT}$ ) of all gene-miRNA interactions involving non-deleted and deleted

63 genes, further stratified as (A) duplicated (grey,  $n = 69,339$  interactions from 4,118 genes; orange,

64  $n = 51,514$  interactions from 2,916 genes) or (B) not duplicated (purple,  $n = 72,826$  interactions

65 from 3,510 genes; blue,  $n = 80,290$  interactions from 3,976 genes). \*\*\*  $p < 0.001$ , two-sided

66 Kolmogorov-Smirnov test. (C)  $P_{CT}$  scores for all gene sets in (A) and (B) superimposed on one

67 plot. (D) Mean gene-level  $P_{CT}$  scores when aggregating sets of duplicated/not duplicated (left) or

68 deleted/not deleted (right) genes. \*\*\*  $p < 0.0001$ , two-sided Wilcoxon rank-sum test.



69  
70 **Supplemental Figure S2: P<sub>CT</sub> scores of X-Y pairs across 8 mammals.** (A) P<sub>CT</sub> score  
71 distributions of all gene-miRNA interactions involving X-Y pairs across eight sequenced  
72 mammalian Y chromosomes (n = 647 interactions from 32 genes) and other ancestral X genes (n  
73 = 8,831 interactions from 457 genes). \*\* p < 0.01, two-sided Kolmogorov-Smirnov test. (B)  
74 Gene-level mean P<sub>CT</sub> scores. \* p < 0.05, two-sided Wilcoxon rank-sum test.

75  
76 **Supplemental Figure S3: Resampled mean P<sub>CT</sub> scores of X-linked genes.** (A) Resampled  
77 gene-miRNA P<sub>CT</sub> scores for human X-Y pairs (n = 15 genes), X-inactivated genes (n = 329  
78 genes) and X escape genes (n = 56 genes). (B) Resampled gene-miRNA P<sub>CT</sub> scores for X-Y pairs  
79 across eight mammals (n = 32 genes) and genes with no Y homolog in any of eight mammals (n  
80 = 457 genes). Points and error bars represent the median and 95% confidence intervals from  
81 1,000 gene samplings with replacement. \* p < 0.05, \*\* p < 0.01, empirical p-value computed as  
82 the fraction of random non-overlapping gene sets with a median difference in P<sub>CT</sub> score at least  
83 as large as the true difference.

84  
85 **Supplemental Figure S4: P<sub>CT</sub> score comparisons with consistent and variable escape genes**  
86 **separated.** (A) P<sub>CT</sub> score distributions of all gene-miRNA interactions involving X-Y pairs (n =  
87 371 interactions from 16 genes), X-inactivated genes (n = 6743 interactions from 329 genes),  
88 consistent escape genes (n = 567 interactions from 30 genes), or variable escape genes (n = 470  
89 interactions from 26 genes) as defined by Balaton et al (Balaton et al., 2015). \* p < 0.05, \*\* p <  
90 0.01, two-sided Kolmogorov-Smirnov test. (B) Resampled gene-miRNA P<sub>CT</sub> scores of gene  
91 classes from (A). Points and error bars represent the median and 95% confidence intervals from

92 1,000 gene samplings with replacement. \*  $p < 0.05$ , empirical p-value computed as the fraction  
93 of random non-overlapping gene sets with a median difference in  $P_{CT}$  score at least as large as  
94 the true difference.

95  
96 **Supplemental Figure S5:  $P_{CT}$  score comparisons with discordant genes included as X-**  
97 **inactivated or escape.**  $P_{CT}$  score distributions of all gene-miRNA interactions (A,C) or mean  
98 gene-level  $P_{CT}$  score (B,D) of classes of X-linked genes with genes with a discordant XCI call ( $n$   
99 = 721 interactions from 40 genes) included as X-inactivated (A,B) or X escape (C,D). Numbers  
100 of gene-miRNA interactions and genes as in Figure 1, but with the addition of discordant gene  
101 numbers/interactions to X-inactivated genes (A,B) or X escape genes (C,D). \*  $p < 0.05$ , \*\*  $p <$   
102  $0.01$ , two-sided Kolmogorov-Smirnov (A,C) or Wilcoxon rank-sum (B,D) test.

103  
104 **Supplemental Figure S6: Variation in within-UTR conservation does not account for**  
105 **observed differences in  $P_{CT}$  score among classes of X-linked genes.** (A) Example of step-  
106 detection to segment 3' UTRs. Top, base-wise branch length scores; bottom, probabilities of  
107 transition to a new section. Dashed line indicates p-value cutoff used to delineate a new section  
108 (plotted as alternating magenta/yellow points). (B) Boxplots of within-UTR conservation bias  
109 (see Methods) for all gene-miRNA interactions involving classes of X-linked genes. (C)  
110 Comparisons of  $P_{CT}$  scores normalized by within-UTR bias. \*\*,  $p < 0.01$ , \*\*\*  $p < 0.001$ , two-  
111 sided Kolmogorov-Smirnov test.

112  
113 **Supplemental Figure S7: Ancestral miRNA targeting of X-Y pairs across 8 mammals.** (A)  
114 Distributions of sites conserved between 3' UTRs of human and chicken orthologs (top) or

115 comparisons to background expectation (bottom, see Methods) for X-Y pairs across 8 mammals  
116 (n = 25) and other ancestral X genes (n = 351). (D) Statistics as in (C), but using sites conserved  
117 between chicken and opossum 3' UTRs only for genes in the XAR; X-Y pairs across 8 mammals  
118 (n = 15), other ancestral X genes (n = 102).

119  
120 **Supplemental Figure S8: P<sub>CT</sub> scores of Z-W pairs across 4 and 14 birds.** (A,C) P<sub>CT</sub> score  
121 distributions of all gene-miRNA interactions (A) Z-W pairs including predictions from three  
122 additional birds with male and female genome sequence (n = 2,187 interactions from 78 genes)  
123 and other ancestral Z genes (n = 15,357 interactions from 607 genes), or (C) Z-W pairs including  
124 read depth-based predictions from 10 additional birds with only female genome sequence (n =  
125 4,458 interactions from 157 genes) and other ancestral Z genes (n = 13,086 interactions from 528  
126 genes) \*\*\* p < 0.001, two-sided Kolmogorov-Smirnov test. (B,D) Gene-level mean P<sub>CT</sub> scores.  
127 \*\*\* p < 0.01, two-sided Wilcoxon rank-sum test.

128  
129 **Supplemental Figure S9: Resampled mean P<sub>CT</sub> scores of Z-linked genes.** Gene sets: (A)  
130 chicken Z-W pairs (n = 28 genes) and other ancestral Z genes (n = 657 genes), (B) Z-W pairs  
131 across four birds (n = 78 genes) compared to the remainder of ancestral Z genes (n = 607 genes),  
132 and (C) Z-W pairs across 14 birds (n = 157 genes) compared to the remainder of ancestral Z  
133 genes (n = 528 genes). Points and error bars represent the median and 95% confidence intervals  
134 from 1,000 gene samplings with replacement. \*\*\* p < 0.001, empirical p-value computed as the  
135 fraction of random non-overlapping gene sets with a median difference in P<sub>CT</sub> score at least as  
136 large as the true difference.

137

138 **Supplemental Figure S10: Variation in within-UTR conservation cannot account for**  
139 **observed differences in  $P_{CT}$  score among classes of Z-linked genes.** (A) Boxplots of within-  
140 UTR conservation bias (see Methods) for all gene-miRNA interactions involving chicken Z-W  
141 pairs or other ancestral X genes. Numbers of interactions and genes as in Figure 4A. \*\*  $p < 0.01$ ,  
142 two-side Wilcoxon rank-sum test. (B) Comparisons of  $P_{CT}$  scores normalized by within-UTR  
143 bias. \*\*\*  $p < 0.001$ , two-sided Kolmogorov-Smirnov test.

144

145 **Supplemental Figure S11: Correlation of Z-linked gene-specific dosage compensation with**  
146 **gene-level  $P_{CT}$  score.** Distributions of chicken male/female expression ratio, normalized to that  
147 of human and anolis (y-axis) as a function of mean gene-level  $P_{CT}$  quartile (x-axis) for all  
148 expressed Z-linked gene with no W homolog. Expression ratios are plotted on a  $\log_2$  scale;  
149 values closer to 0 imply more effective dosage compensation following W gene loss.

150

151 **Supplemental Figure S12: Ancestral miRNA targeting of Z-W pairs across 4 birds.** (A)  
152 Distributions of sites conserved between 3' UTRs of human and chicken orthologs (top) or  
153 comparisons to background expectation (bottom, see Methods) for Z-W pairs across chicken and  
154 three additional birds with male and female genome sequence (4 birds,  $n = 73$ ) and other  
155 ancestral Z genes ( $n = 532$ ). (D) Statistics as in (C), but using sites conserved between human  
156 and anolis 3' UTRs; Z-W pairs across 4 birds ( $n = 73$ ), other ancestral Z genes ( $n = 527$ ). \*\*\*  $p <$   
157  $0.001$ , two-sided Fisher's exact test.

158

159 **Supplemental Figure S13: Ancestral miRNA targeting of predicted Z-W pairs across 14**  
160 **birds.** (A) Distributions of sites conserved between 3' UTRs of human and chicken orthologs

161 (top) or comparisons to background expectation (bottom, see Methods) for Z-W pairs in chicken,  
162 predicted in three additional birds with male and female genome sequence, and predicted based  
163 on read depth from 10 additional birds with only female genome sequence (14 birds, n = 147)  
164 and other ancestral Z genes (n = 458). (D) Statistics as in (C), but using sites conserved between  
165 human and anolis 3' UTRs; Z-W pairs across 14 birds (n = 147), other ancestral Z genes (n =  
166 453).

167

168 **Supplemental Figure S14: Correlation of Z-linked gene-specific dosage compensation with**  
169 **human-chicken-conserved site excess.** Distributions of chicken male/female expression ratios,  
170 normalized to those of human and anolis (y-axis) for expressed Z-linked genes with no W  
171 homolog with (left) or without (right) an excess of human-chicken-conserved miRNA sites. \*\* p  
172 < 0.01, \*\*\* p < 0.0001, Wilcoxon rank-sum test.

173

174 **Supplemental Figure S15: Gene expression changes following small RNA transfections in**  
175 **human HeLa cells.** \* p < 0.05, \*\*\* p < 0.001, two-sided K-S test.

176

177 **Supplemental Figure S16: Gene expression changes following transfection or knockdown**  
178 **of additional miRNAs in human HCT116 or HEK293 cells.** \*\*\* p < 0.001, two-sided  
179 Kolmogorov-Smirnov test.

180

181 **Supplemental Figure S17: Changes in mRNA stability and translational efficiency and gene**  
182 **expression following miR-155 knockout in mouse immune cells.** In each case, mouse  
183 orthologs of X- or Z-linked genes containing a human-mouse-conserved (hsa-mmu) miR-155

184 site were compared to mouse genes containing only nonconserved miR-155 sites. \*  $p < 0.05$ , \*\*\*

185  $p < 0.001$ , two-sided Kolmogorov-Smirnov test.

186

187 **Supplemental Figure S18: Argonaute binding measured by high-throughput crosslinking-**

188 **immunoprecipitation (CLIP) following miRNA transfection in HEK293 cells.** \*  $p < 0.05$ ,

189 two-sided Fisher's exact test.

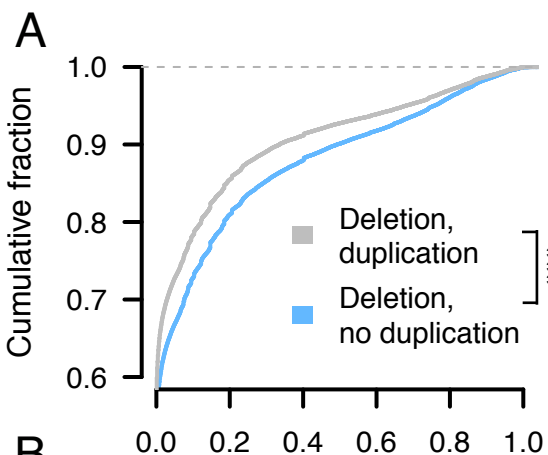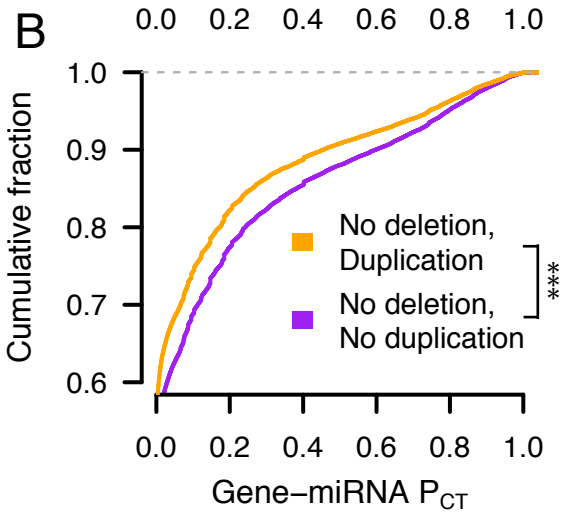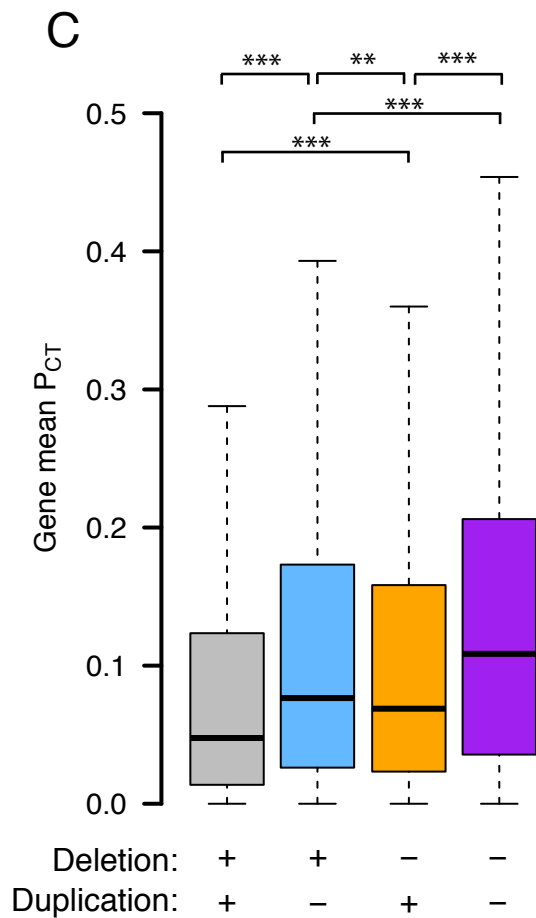

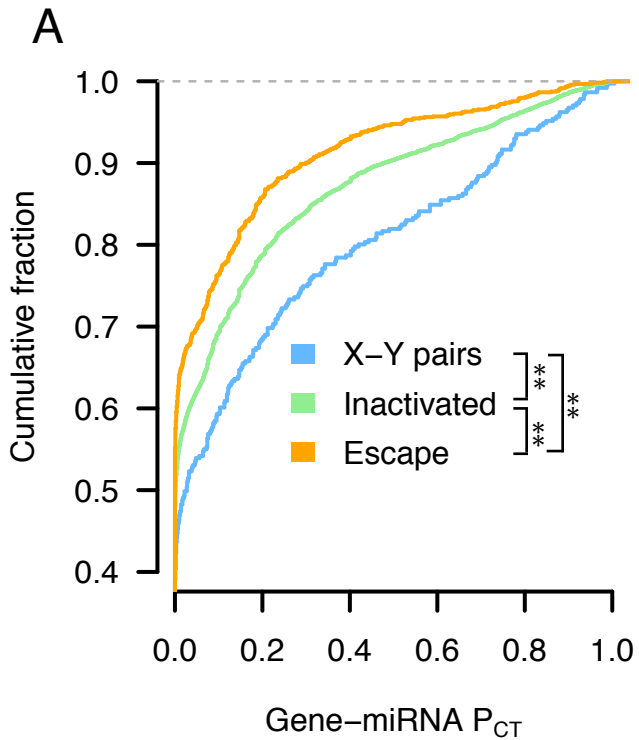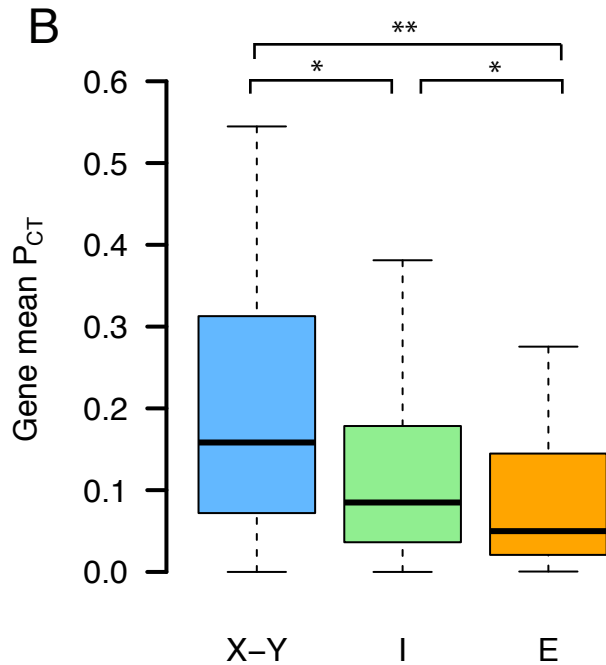



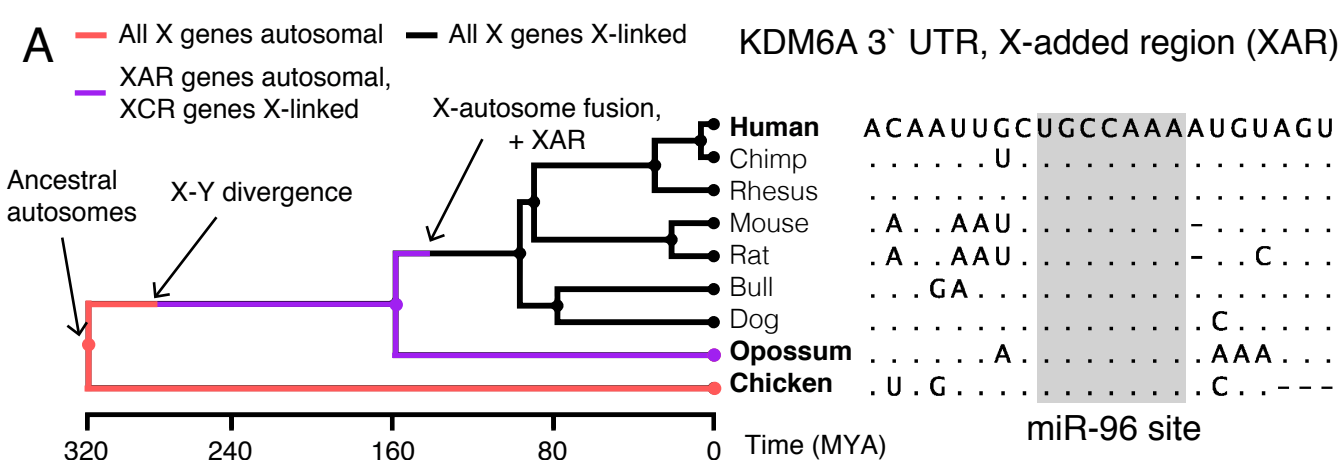

**B** All Ancestral X genes,  
 human-chicken conserved sites

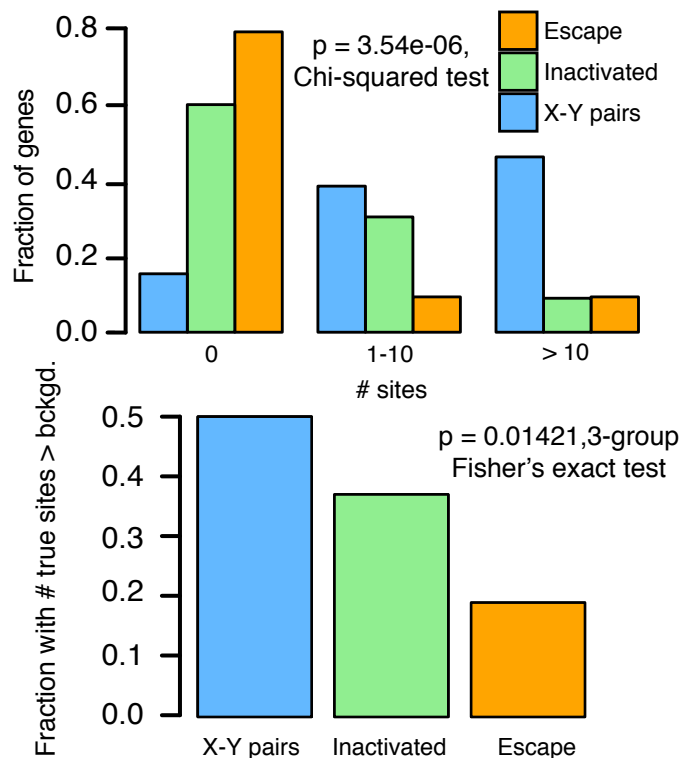

**C** XAR genes only,  
 chicken-opossum conserved sites

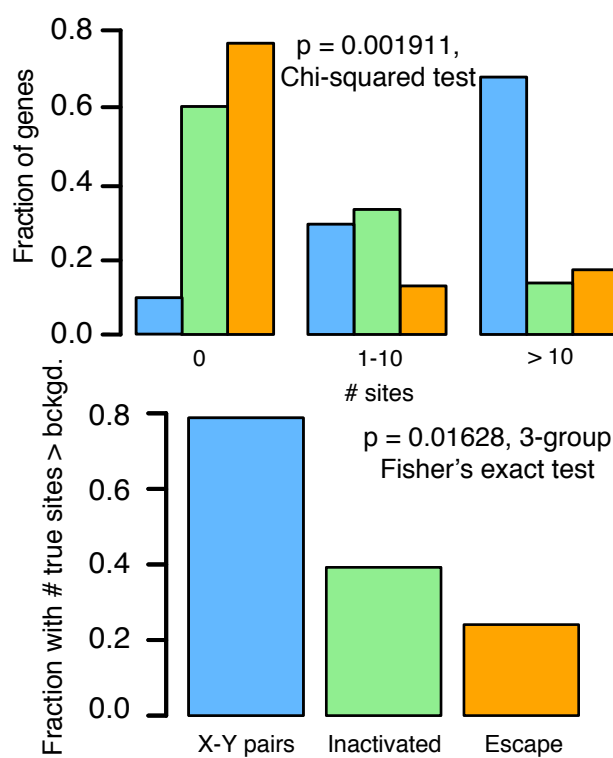

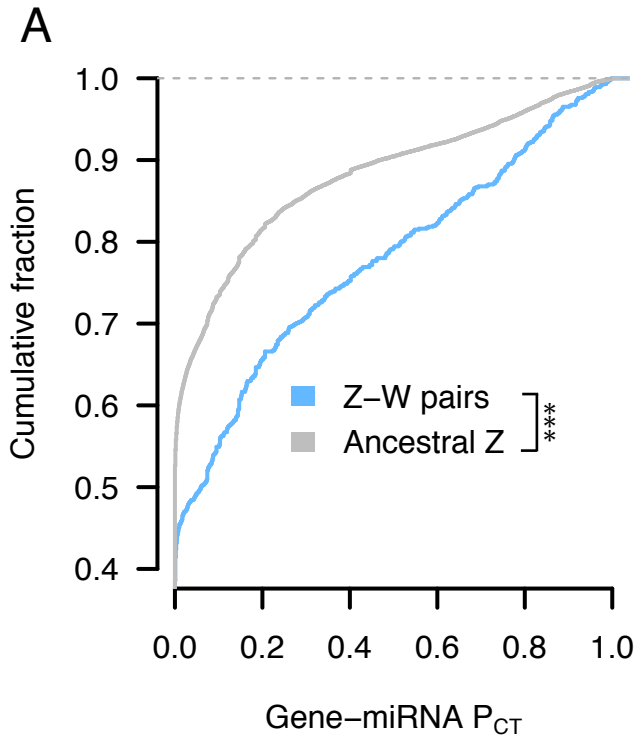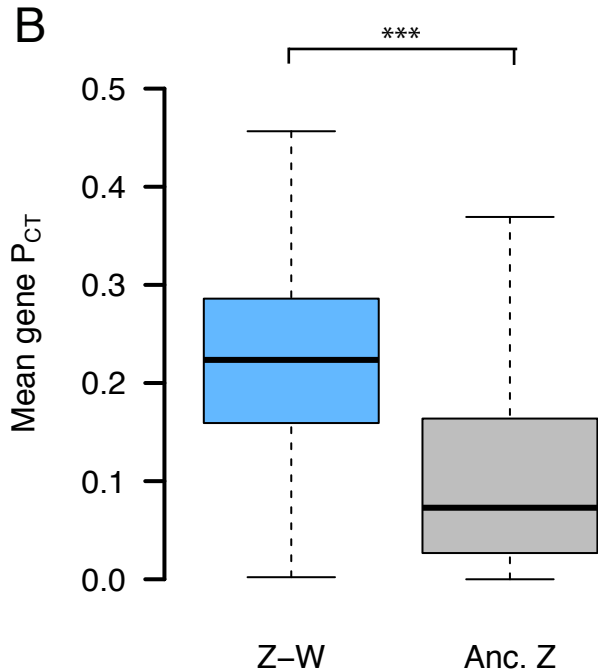

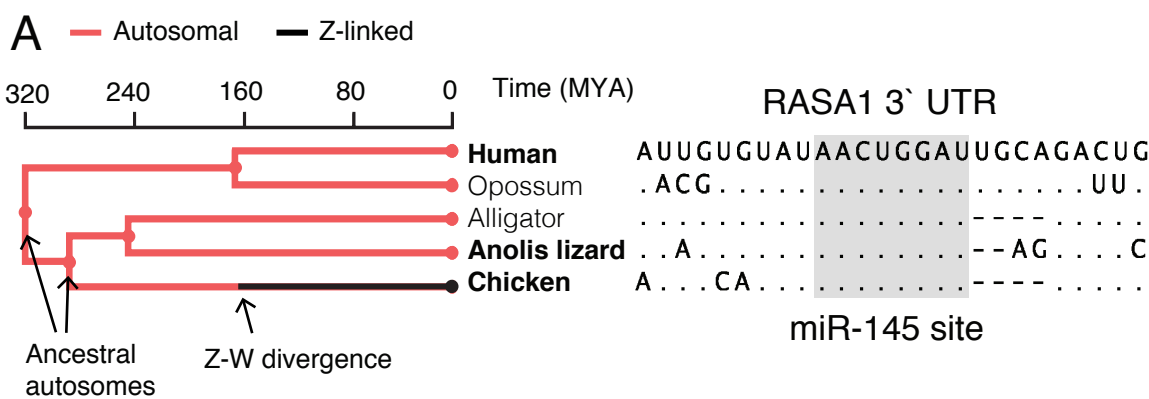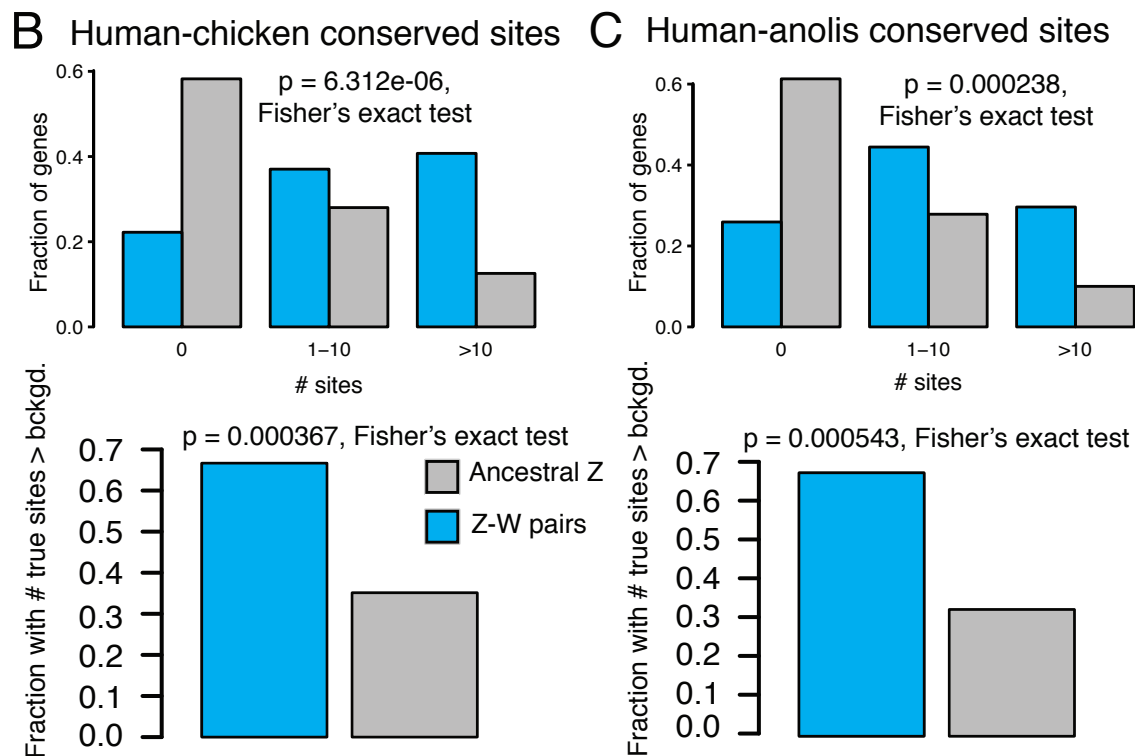

**A** miR-7 transfection, human HCT116 cells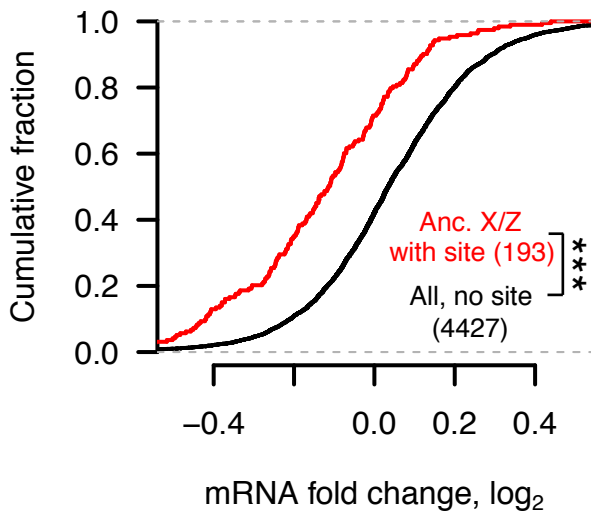**B** miR-124 transfection, human HEK293 cells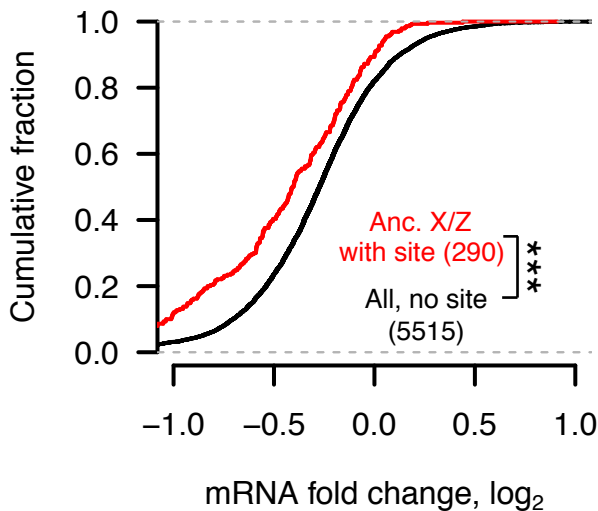**C** miR-124 transfection, human HEK293 cells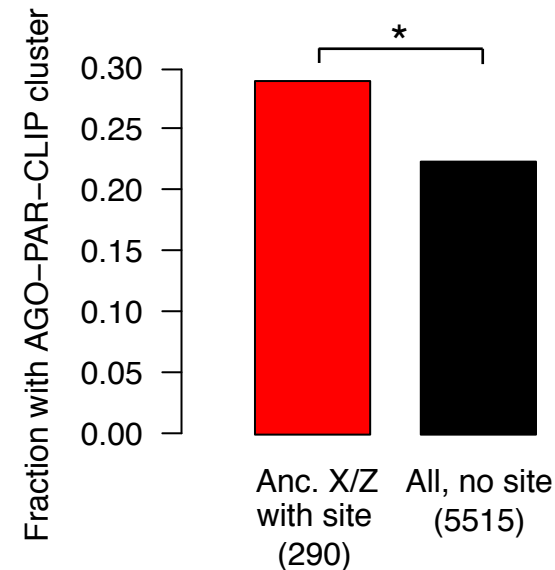**D** miR-155 KO, mouse B cells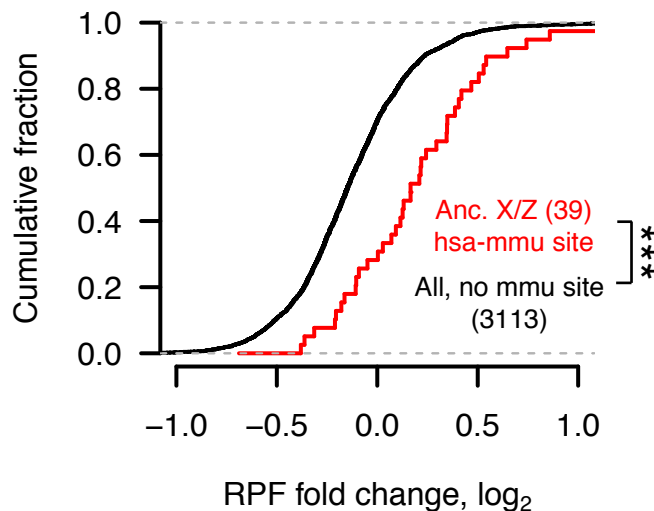

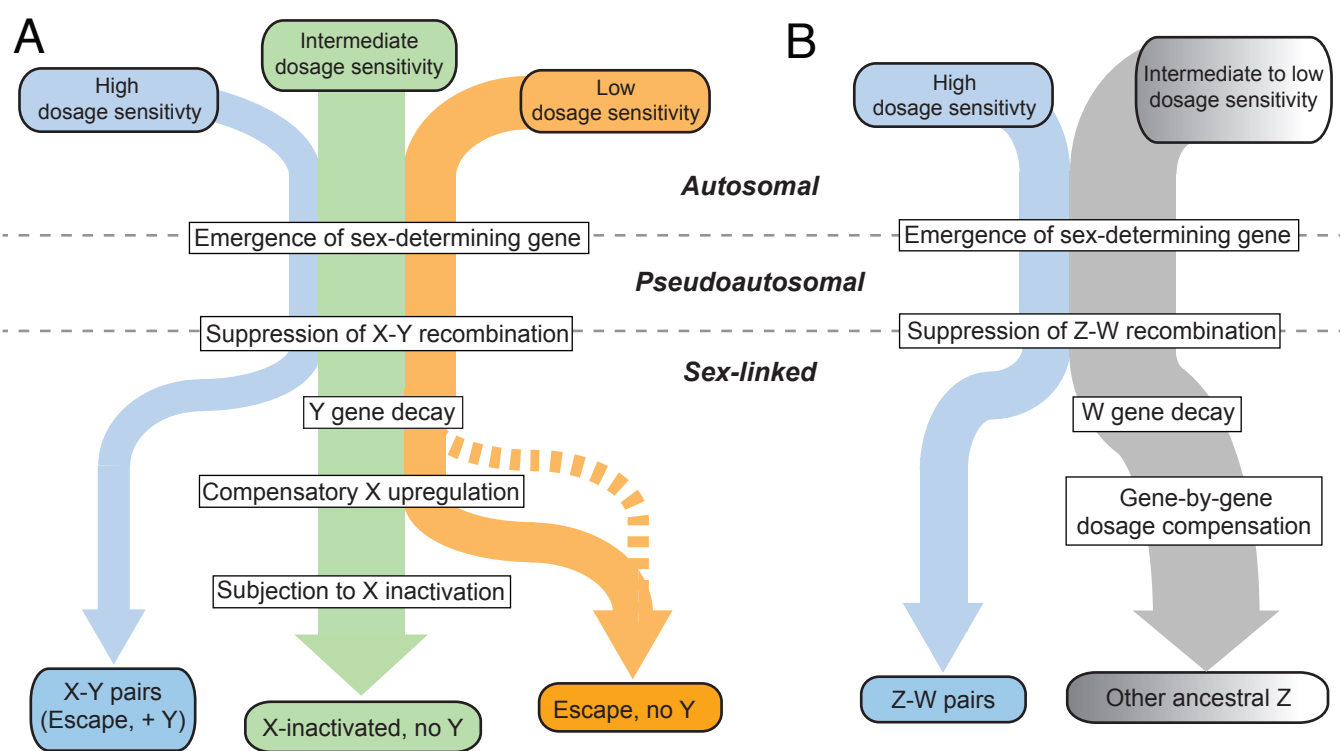

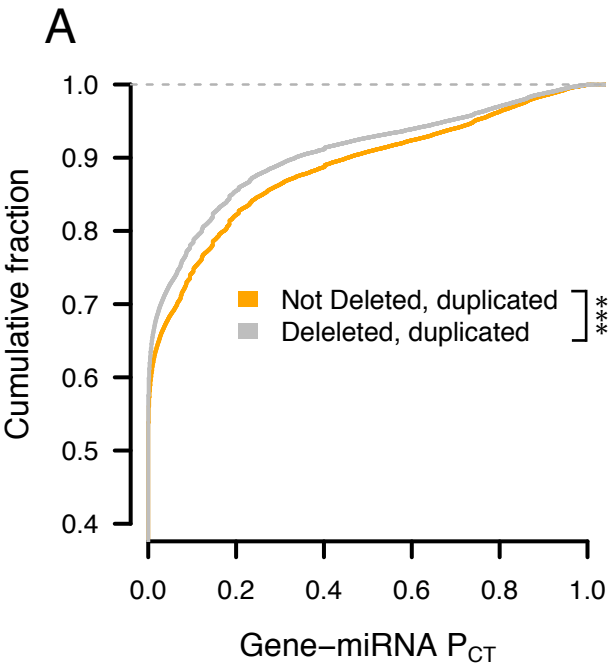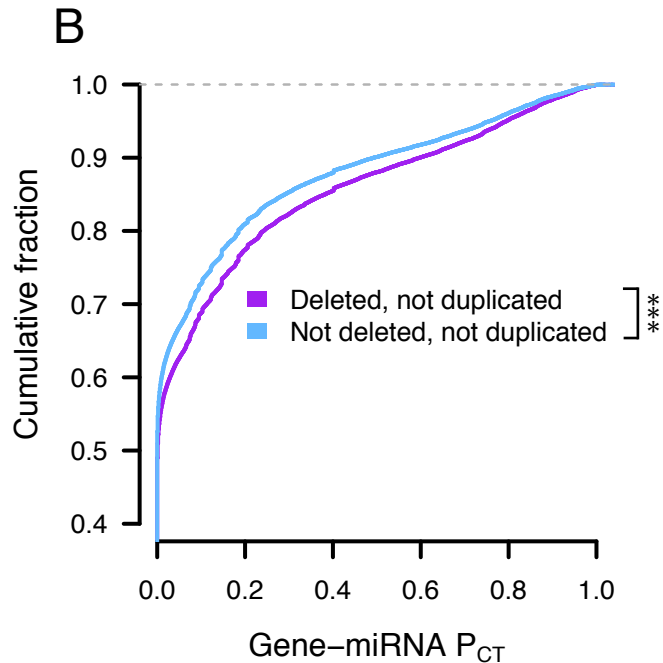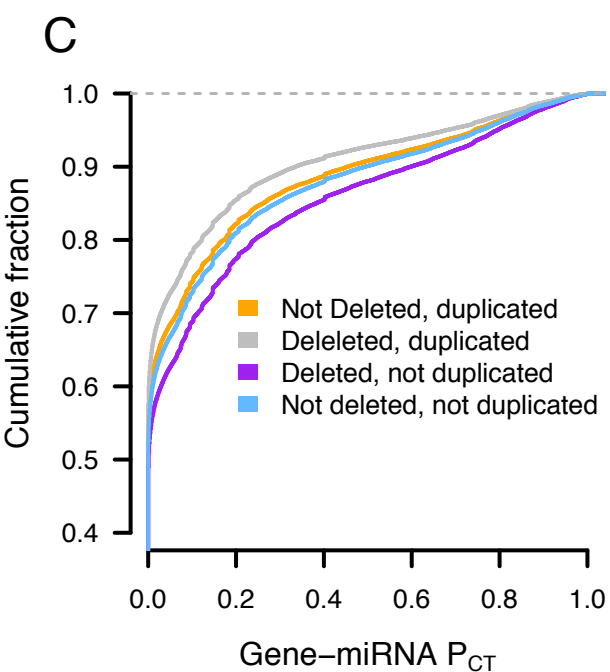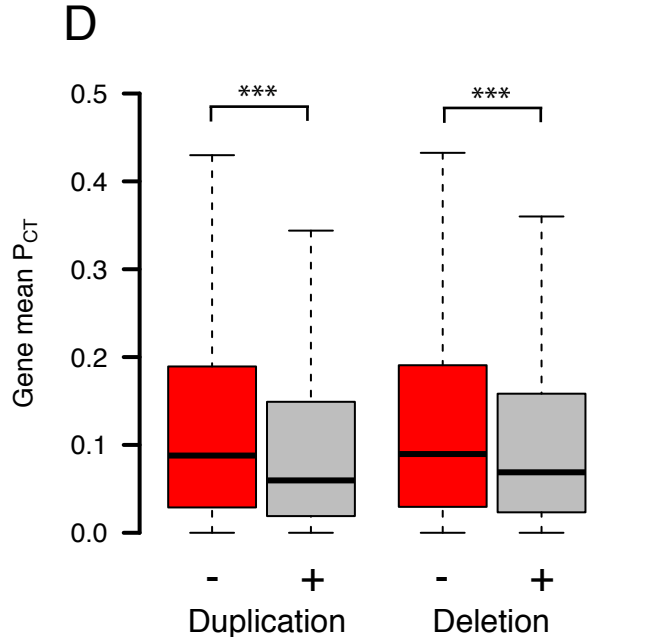

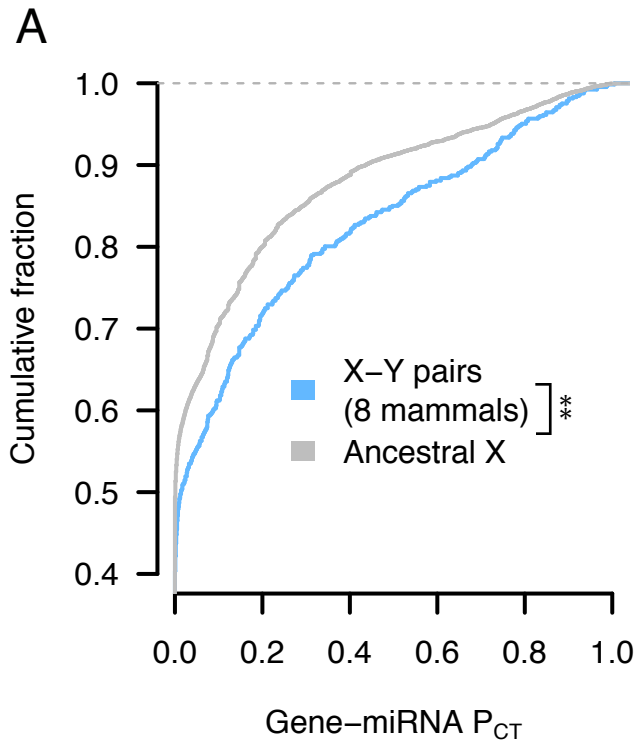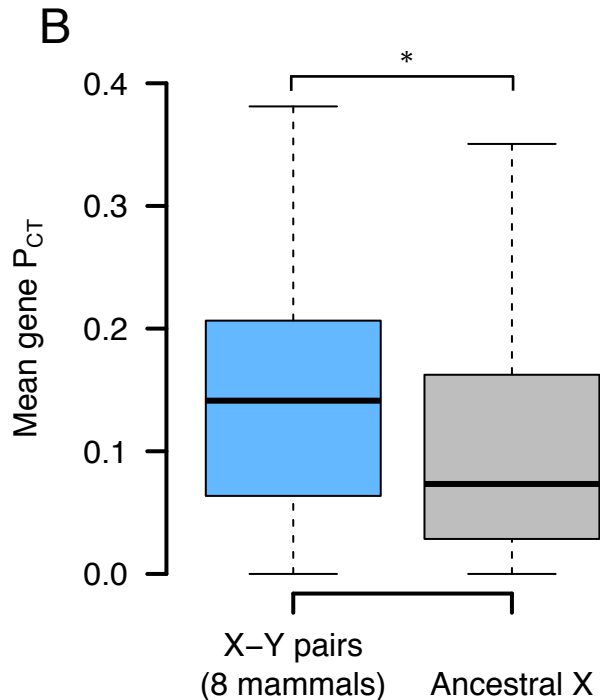

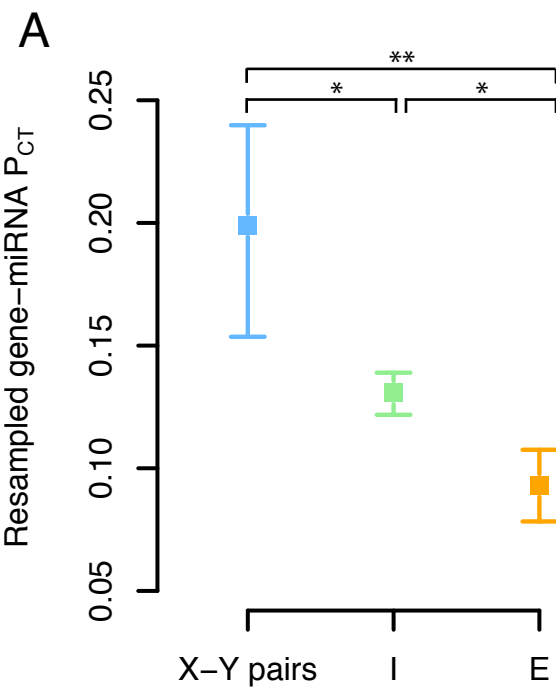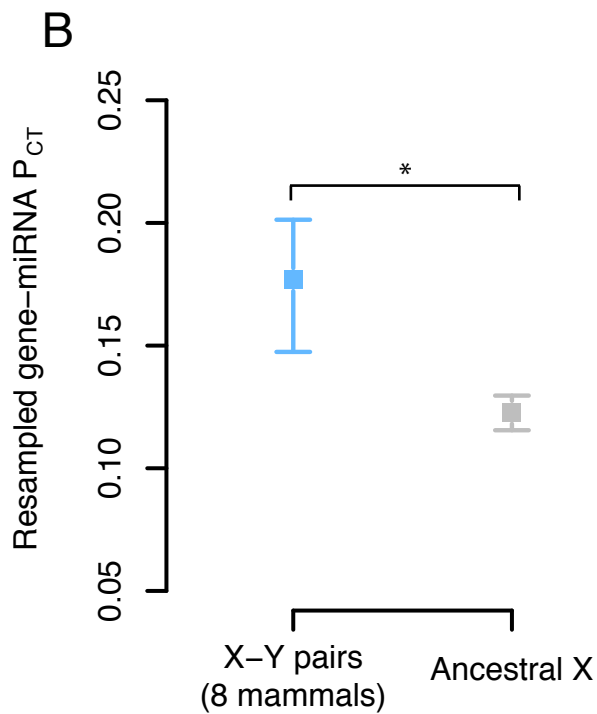



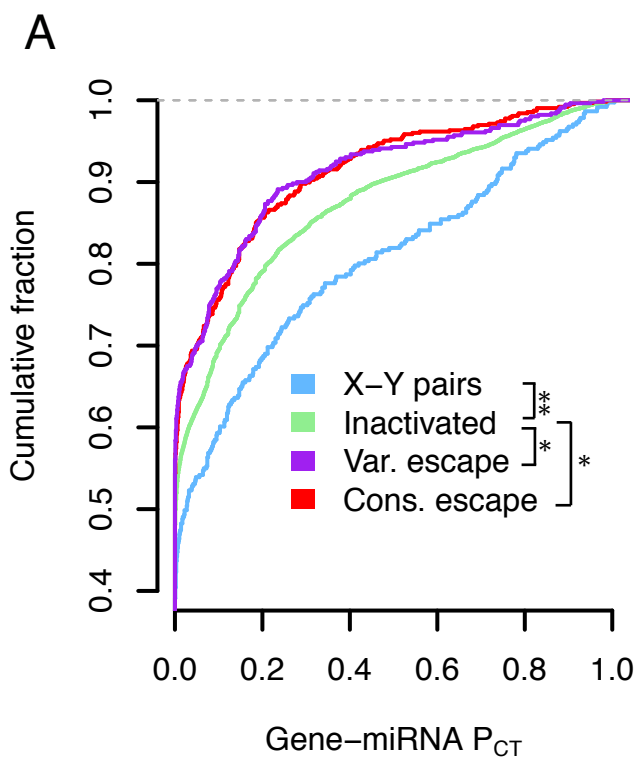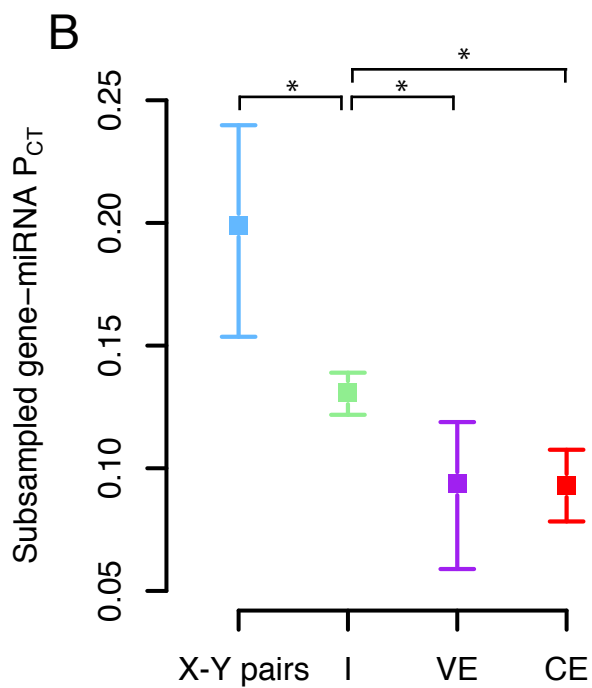

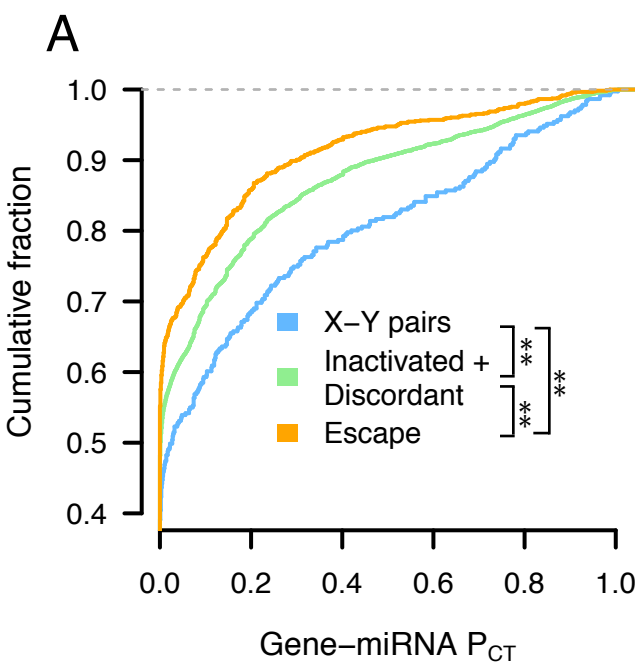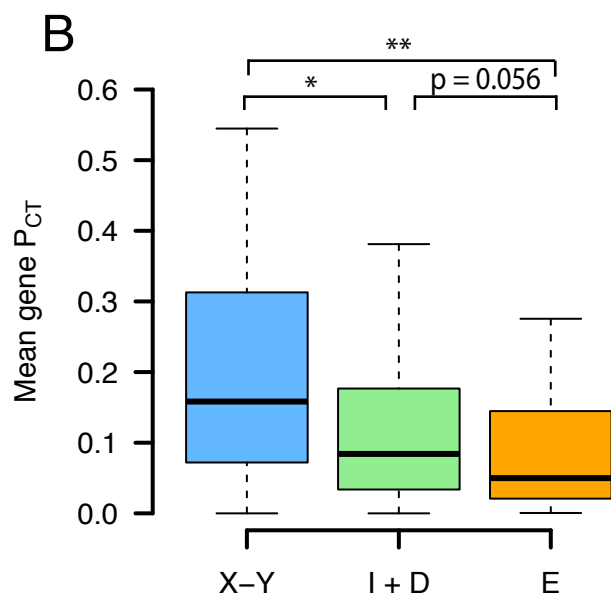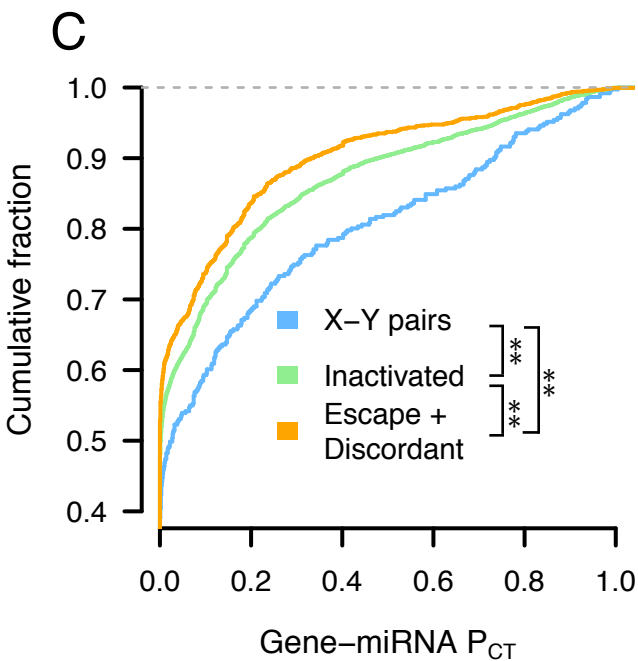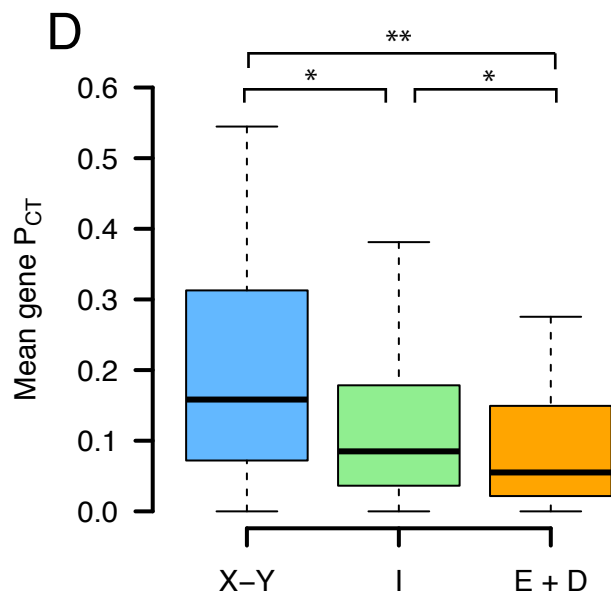

**A**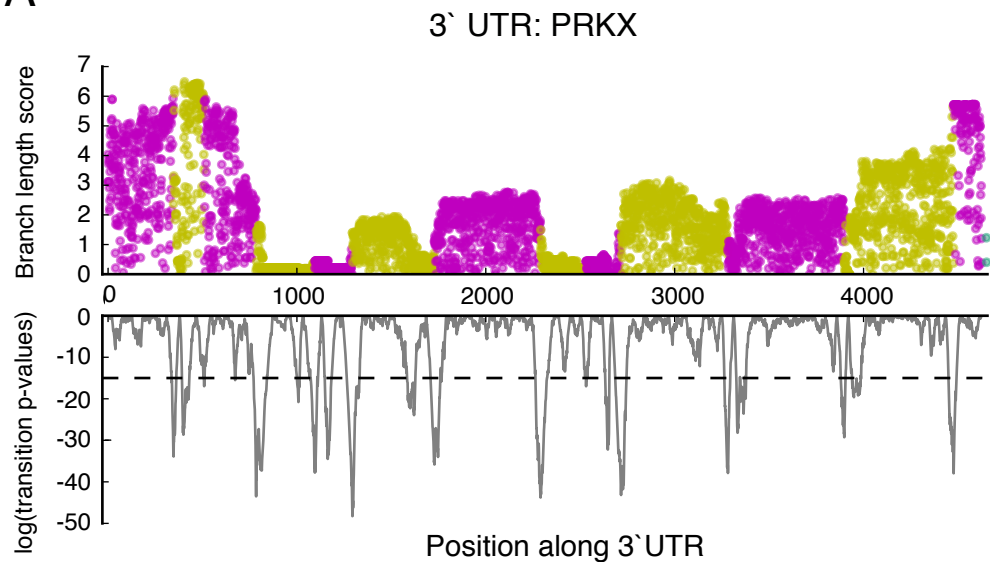**B**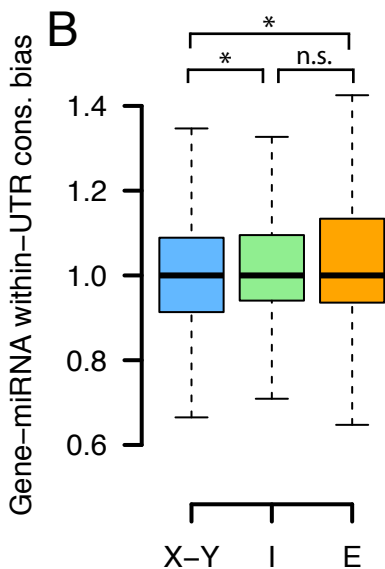**C**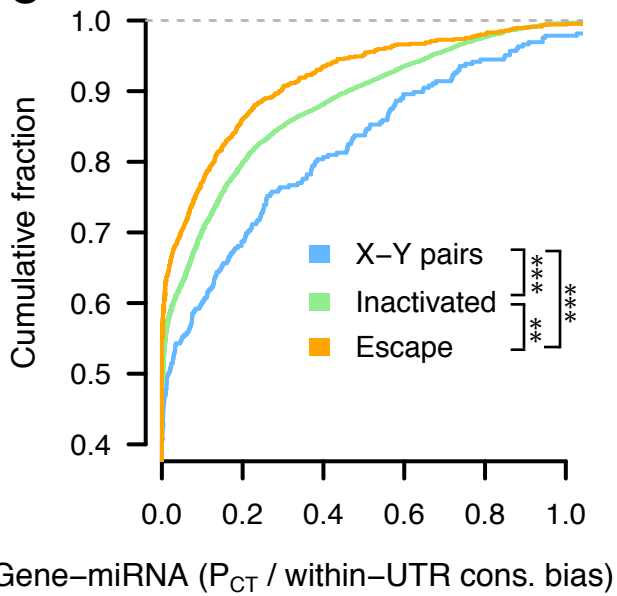

**A** All Ancestral X genes,  
human-chicken conserved sites

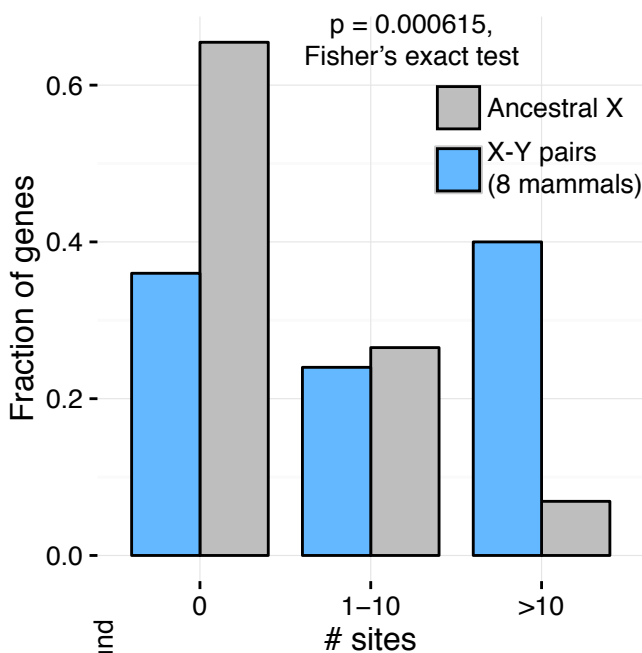

**B** XAR genes only,  
chicken-opossum conserved sites

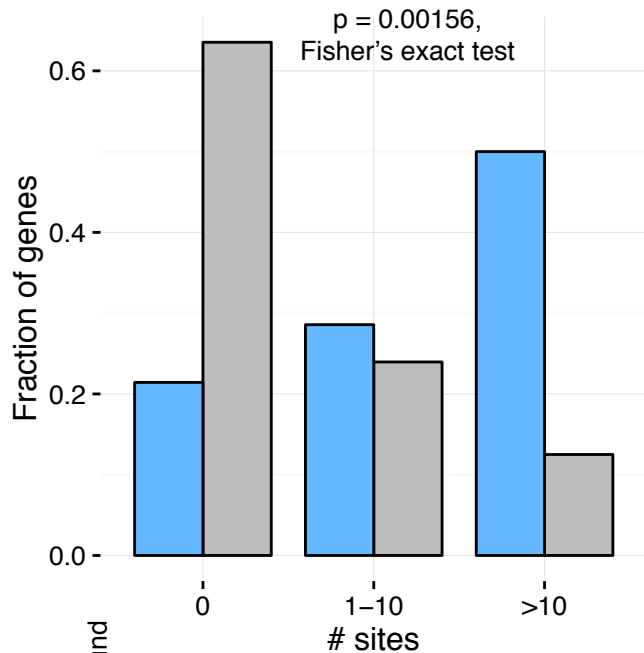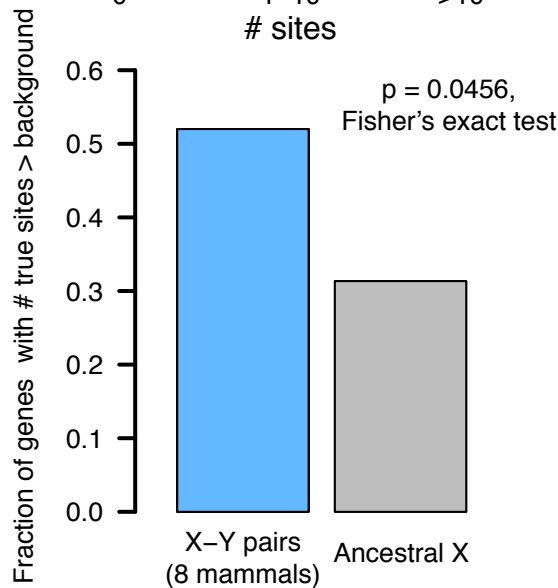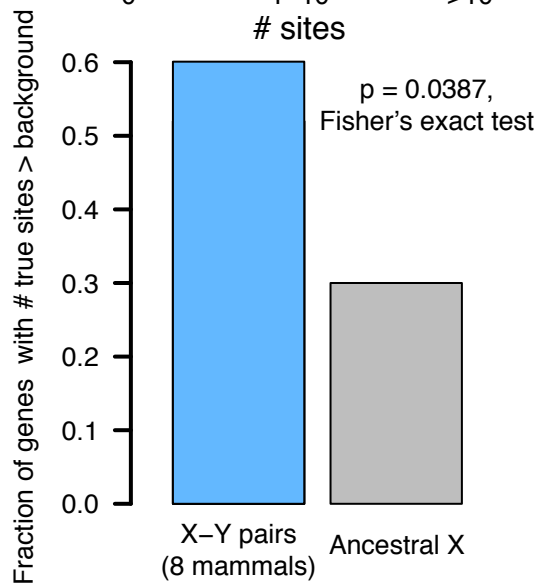

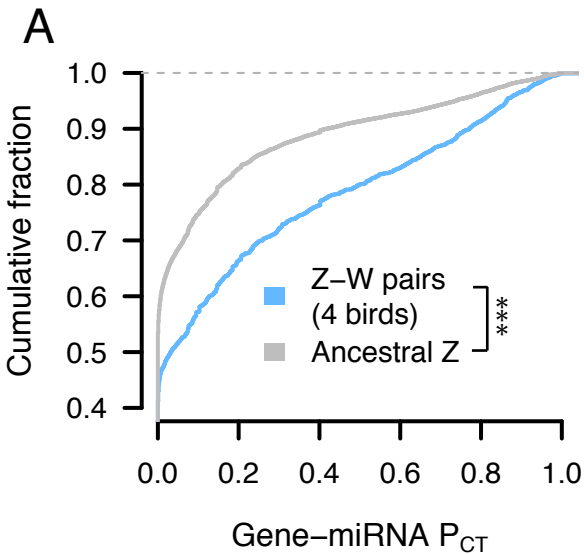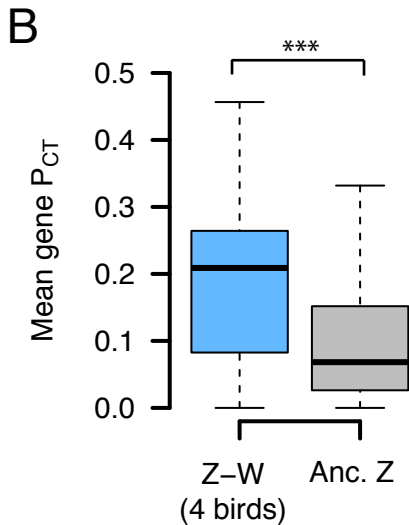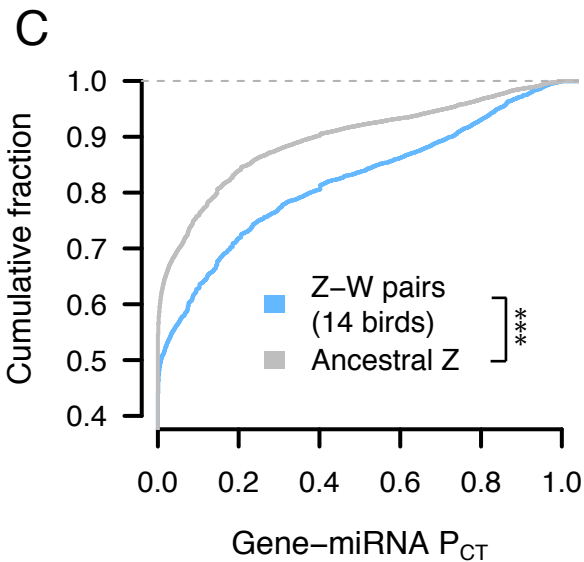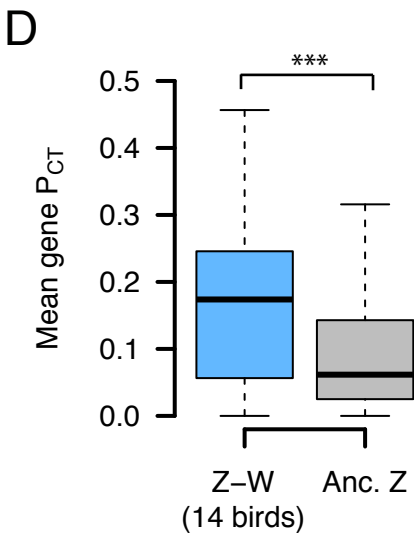

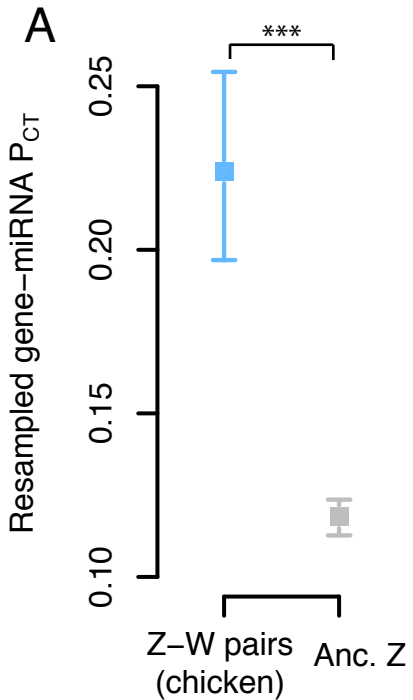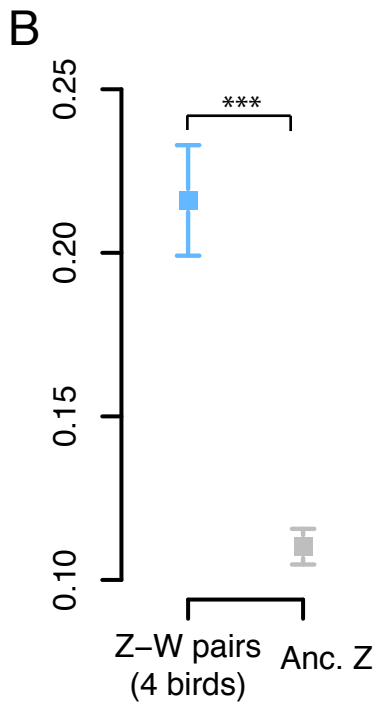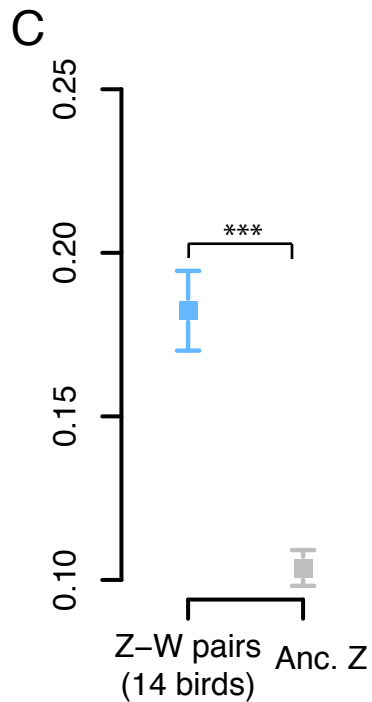

**A**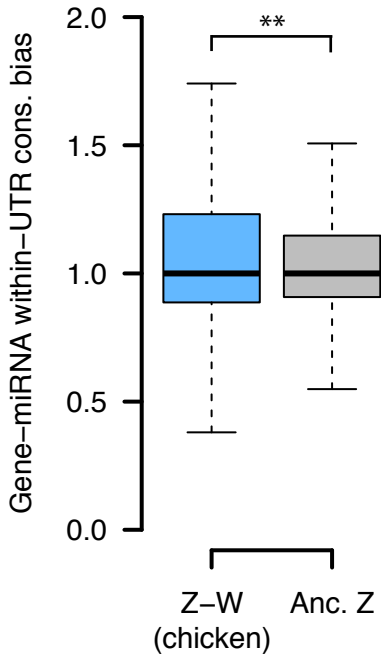**B**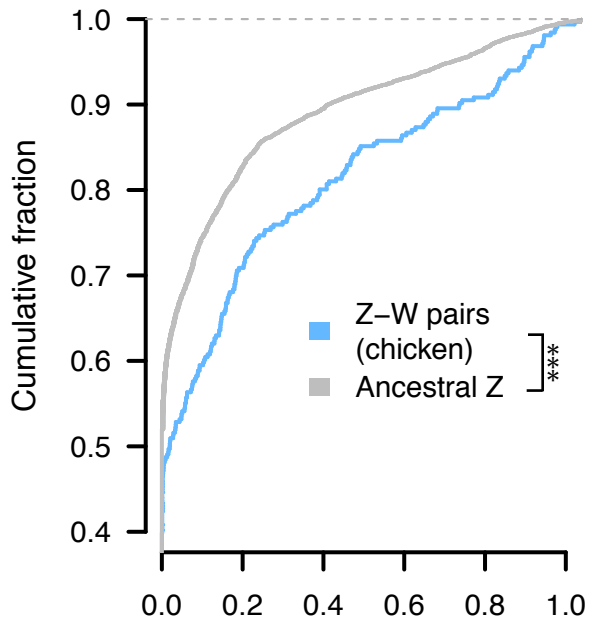

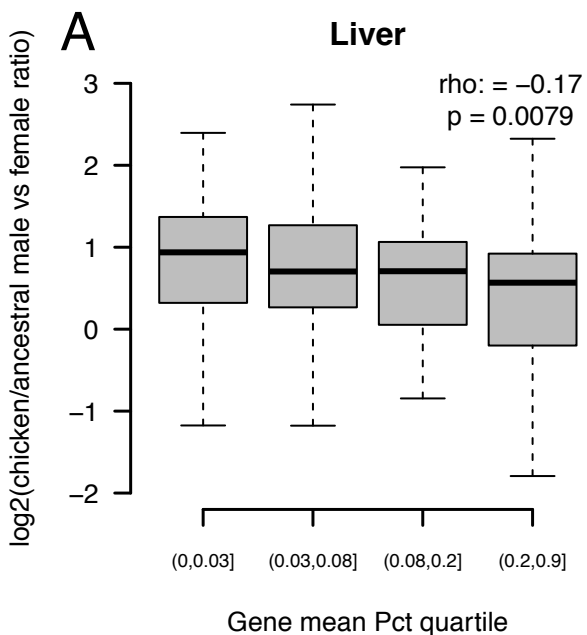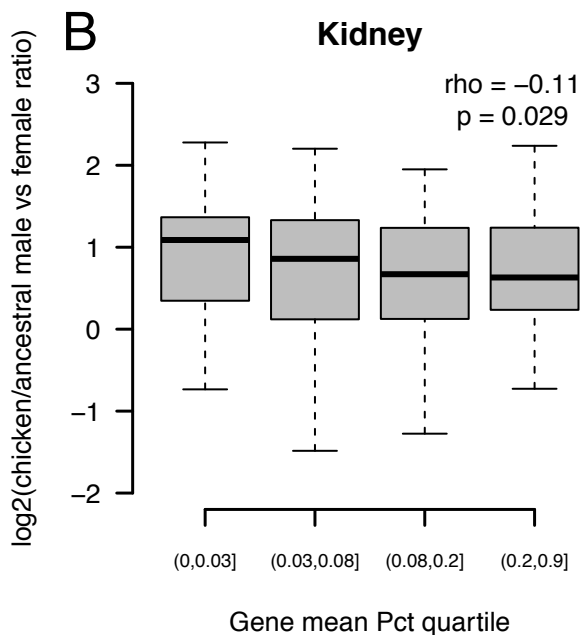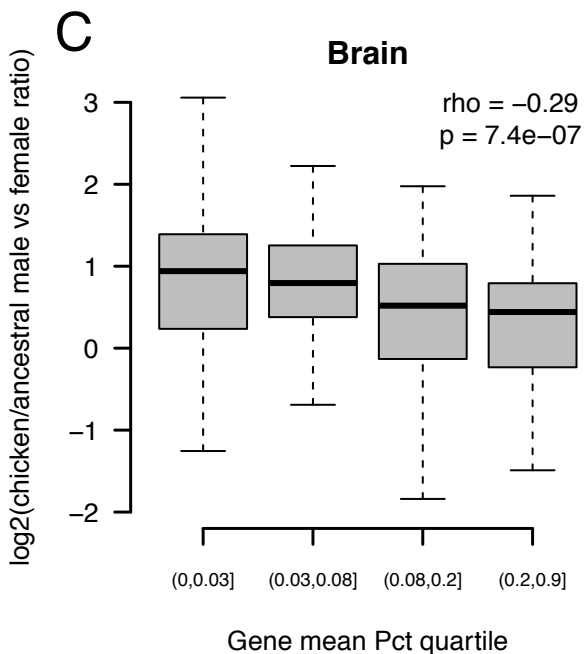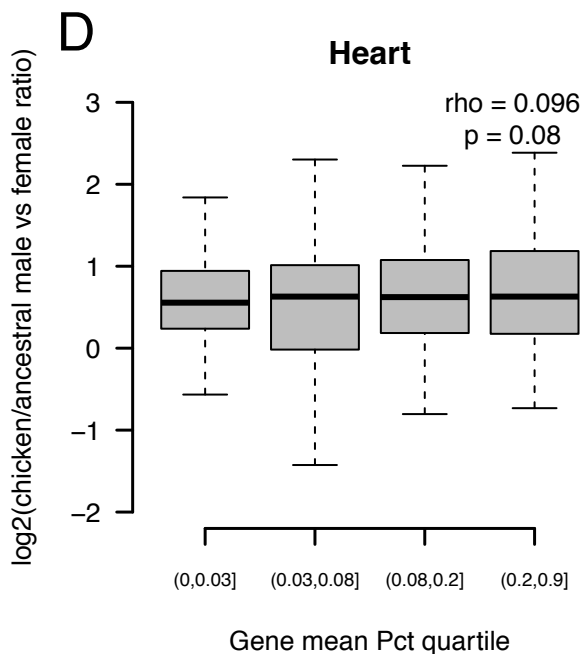



**A** Human-chicken conserved sites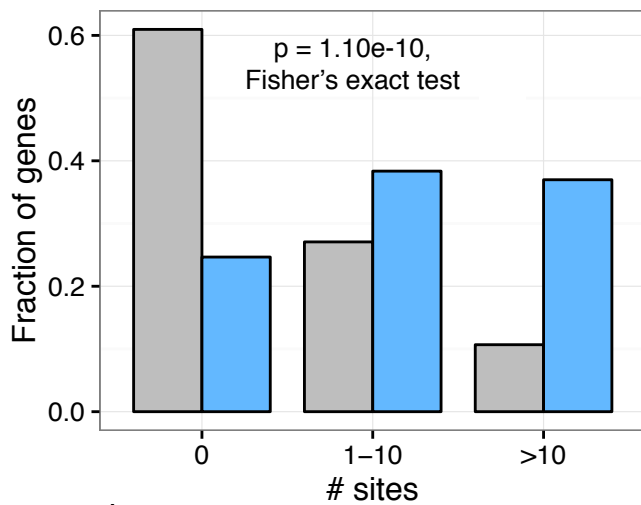**B** Human-anolis conserved sites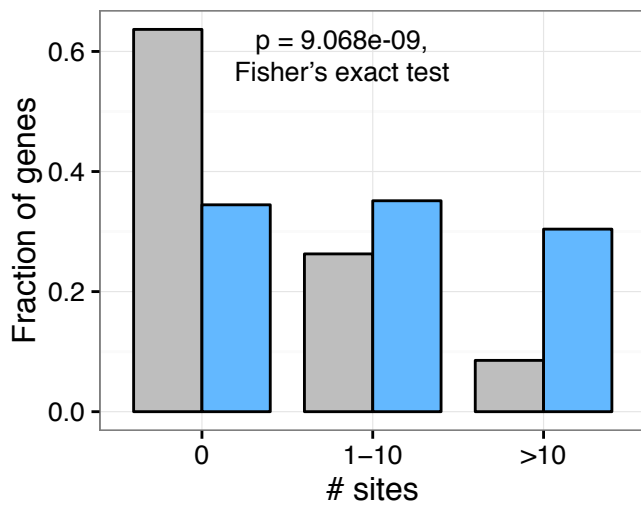

Fraction with # true sites &gt; bckgd.

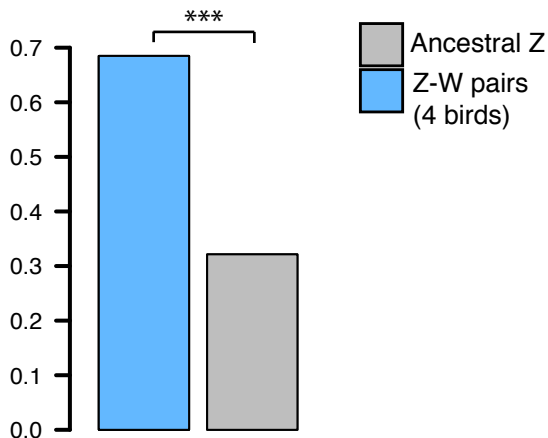

Fraction with # true sites &gt; bckgd.

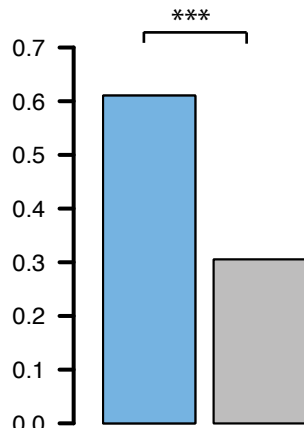

**A** Human-chicken conserved sites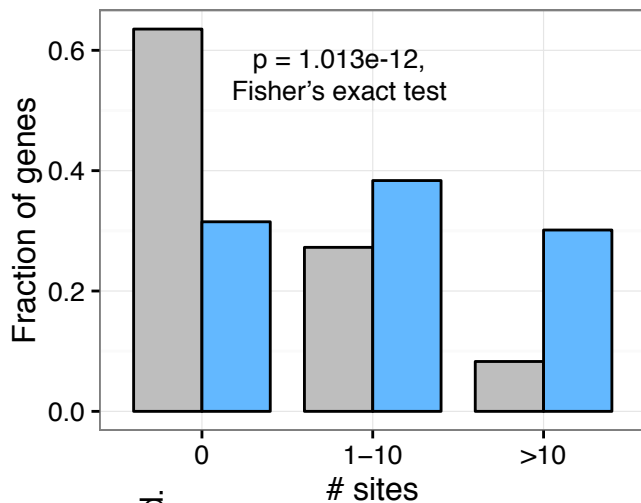**B** Human-anolis conserved sites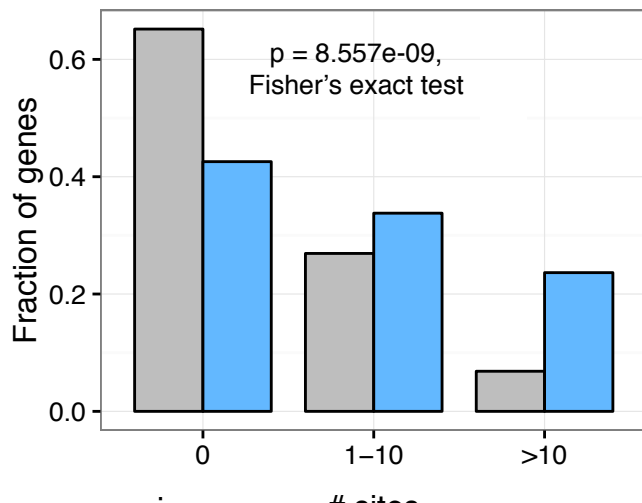

Fraction with # true sites &gt; bckgd.

0.0  
0.1  
0.2  
0.3  
0.4  
0.5  
0.6  
0.7

\*\*\*

Ancestral Z  
Z-W pairs  
(14 birds)

Fraction with # true sites &gt; bckgd.

0.0  
0.1  
0.2  
0.3  
0.4  
0.5  
0.6  
0.7

\*\*\*

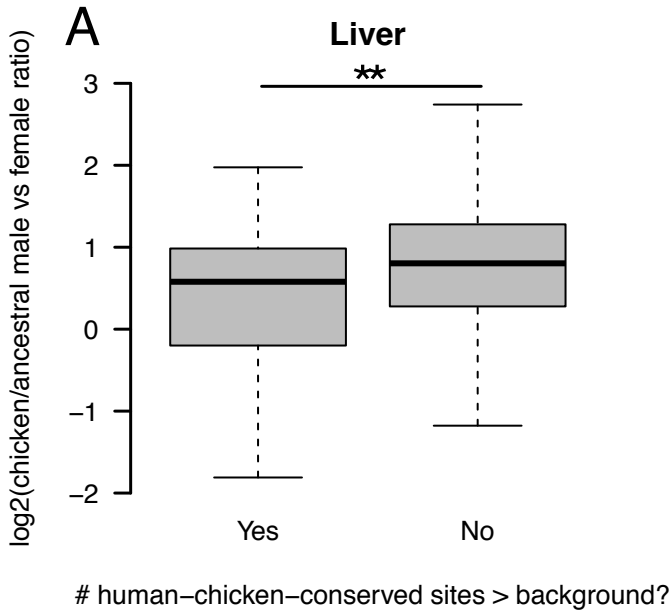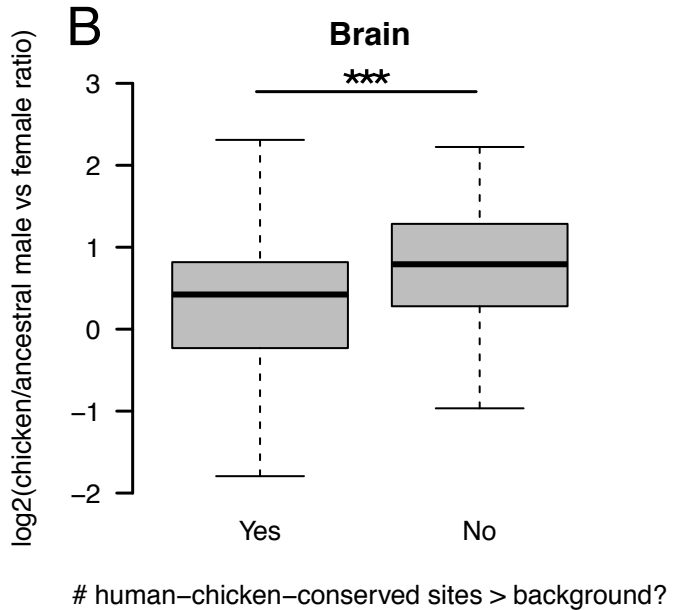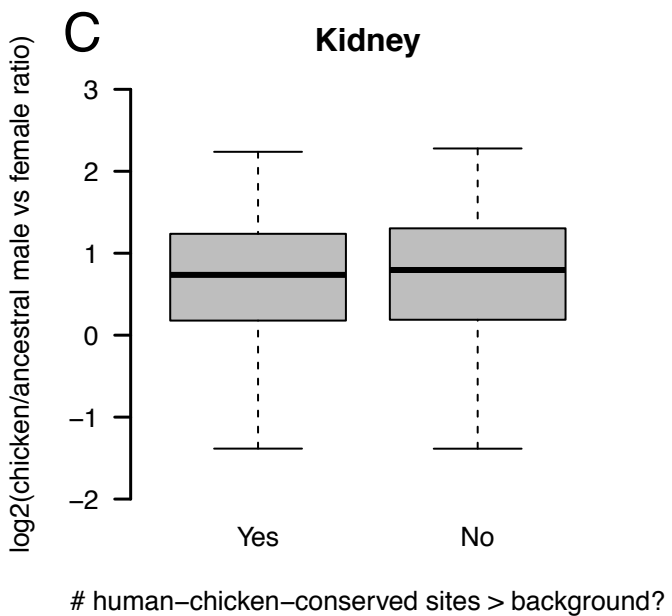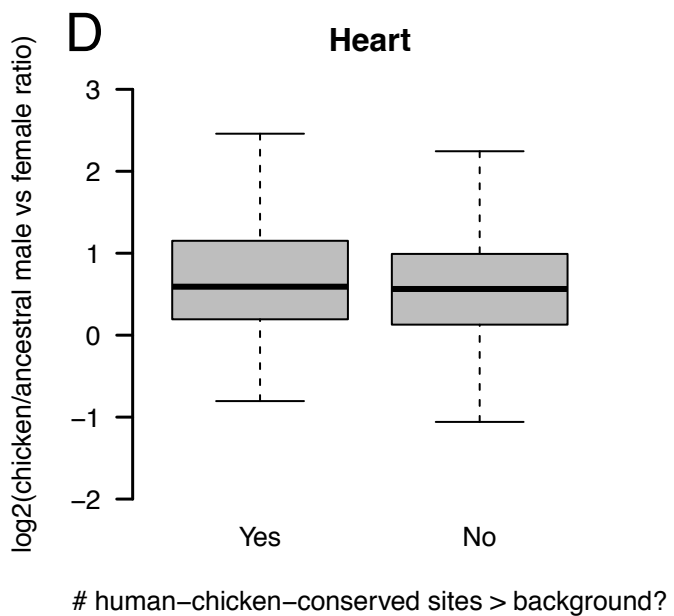

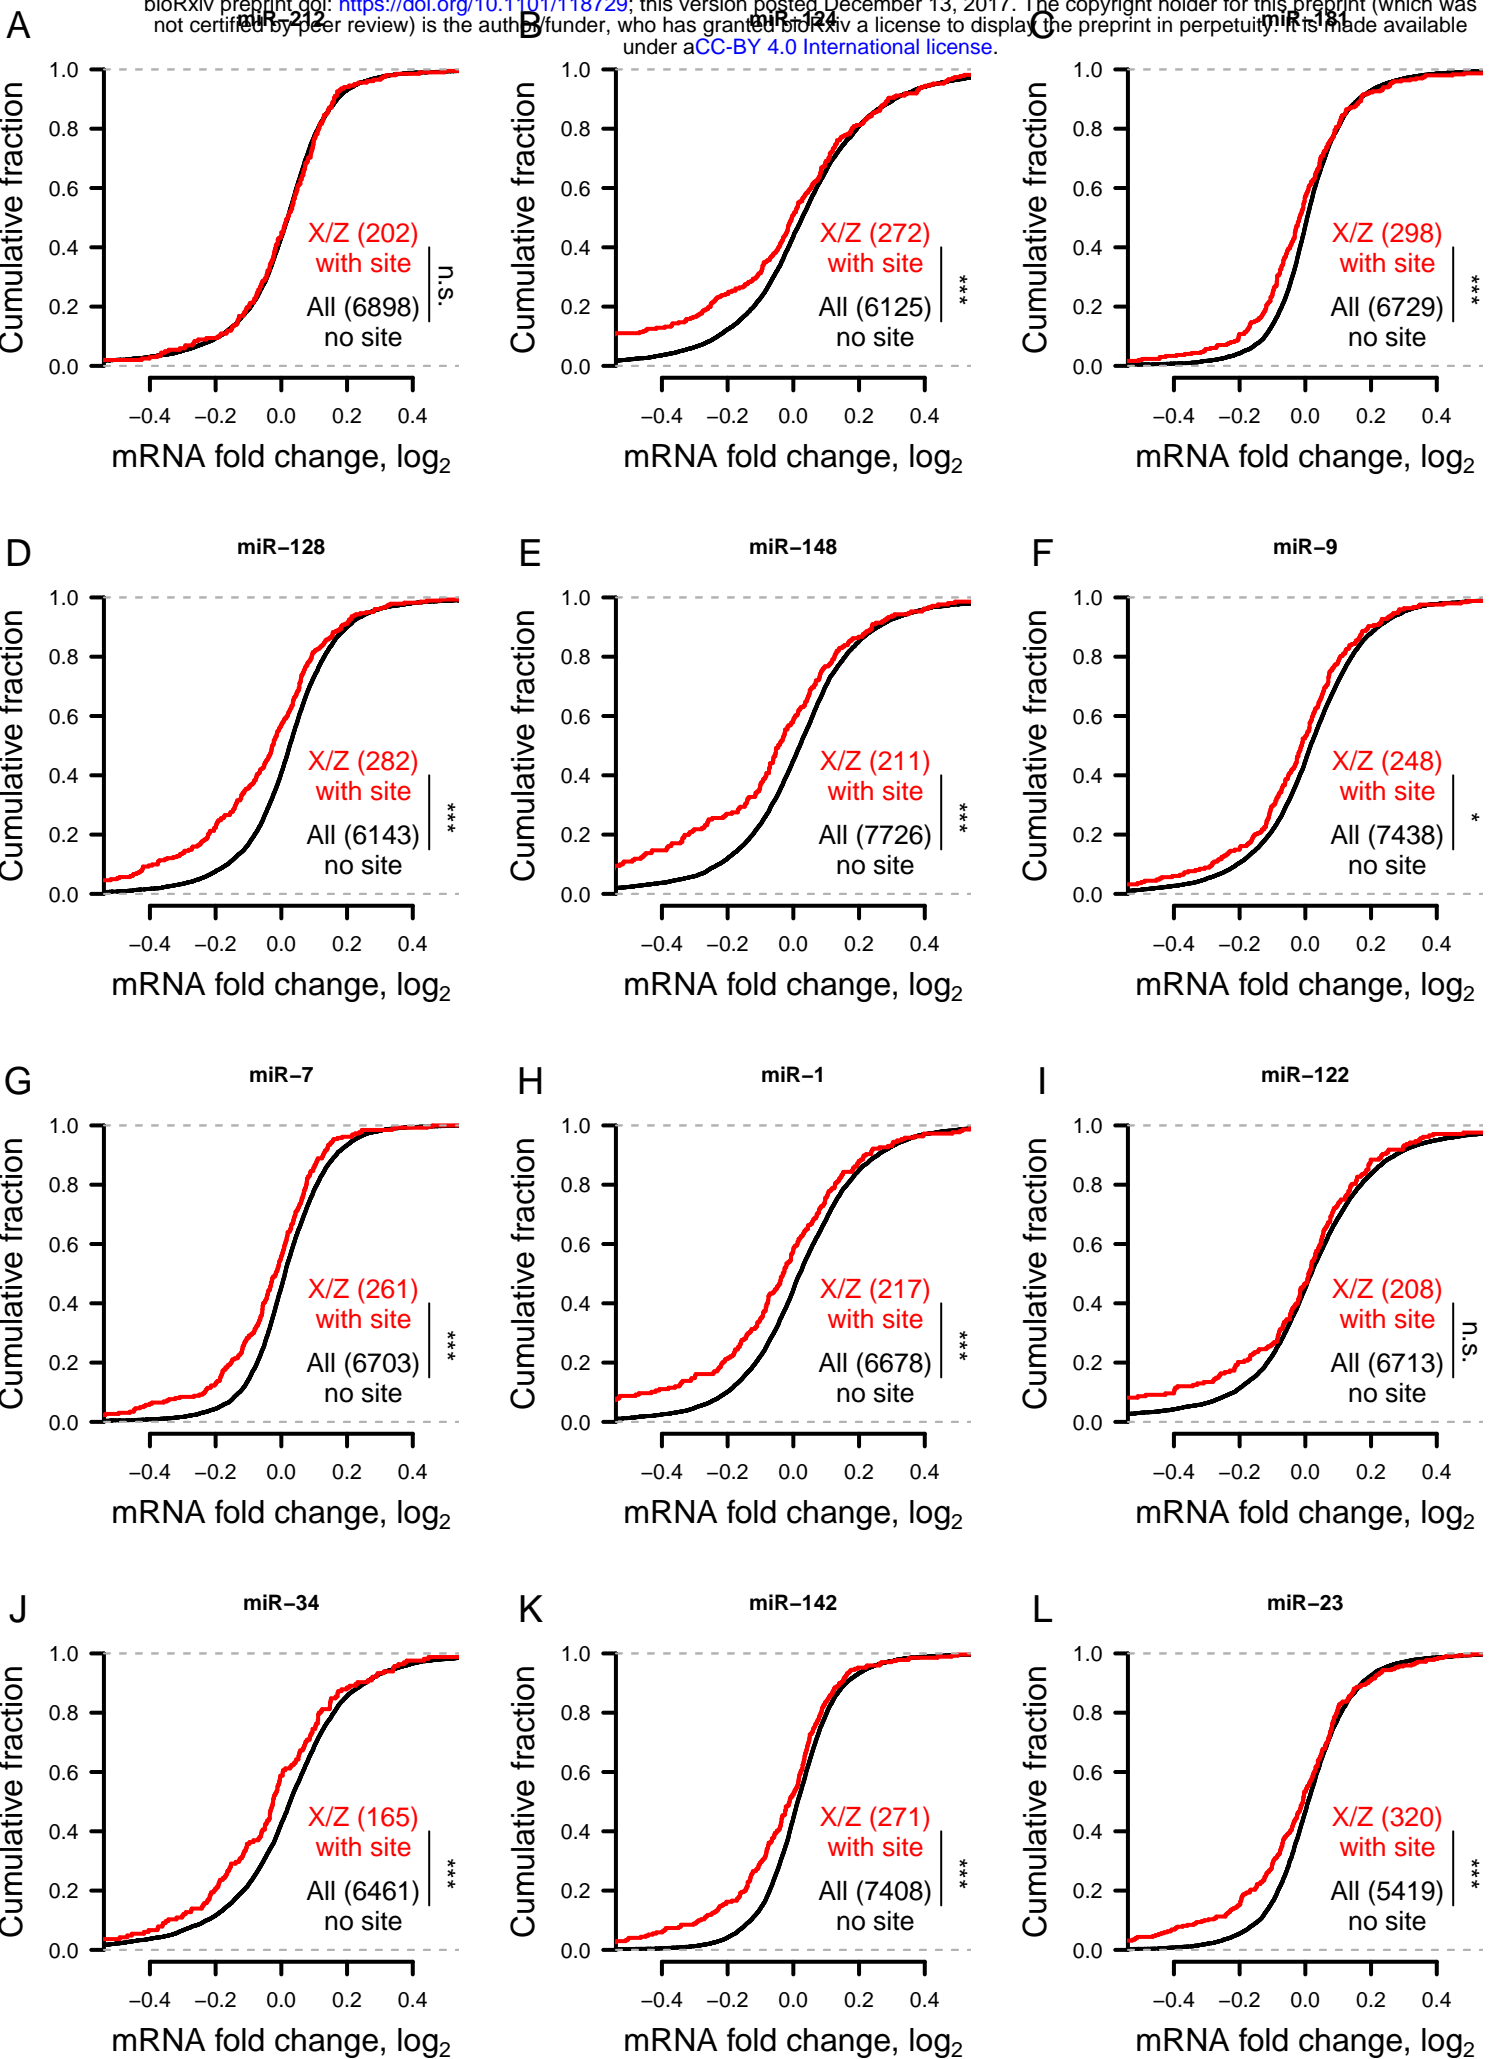

**A** miR-103 transfection, HCT116 cells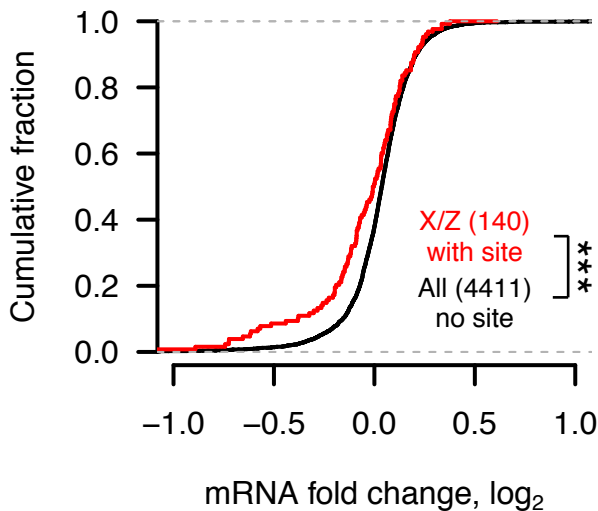**B** miR-7 transfection, HCT116 cells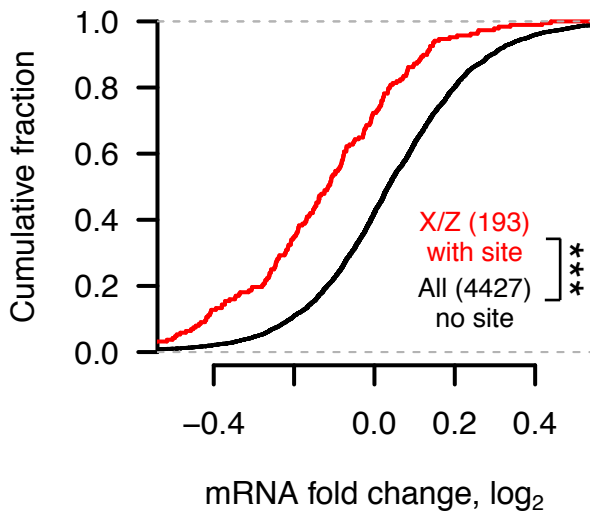**C** miR-92a knockdown, HEK293 cells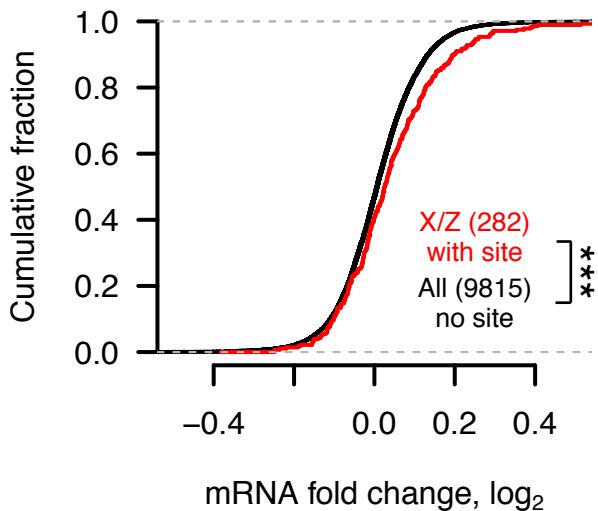**D** miR-124 transfection, HEK293 cells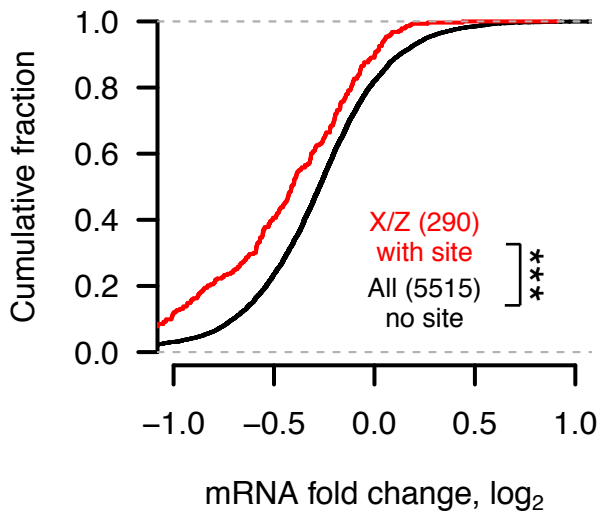

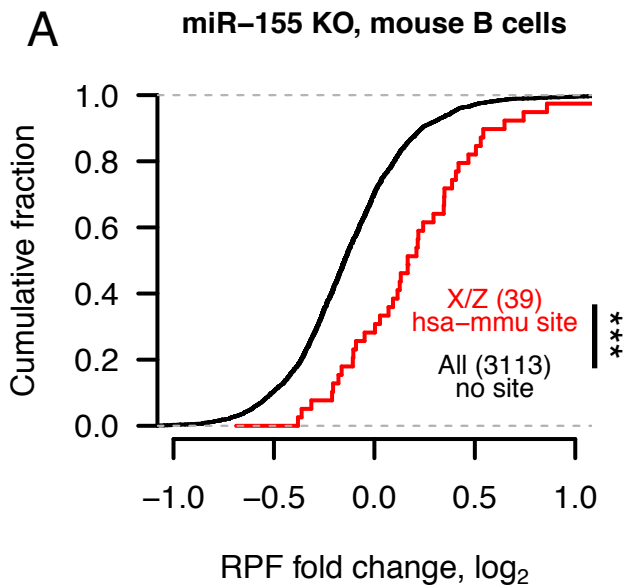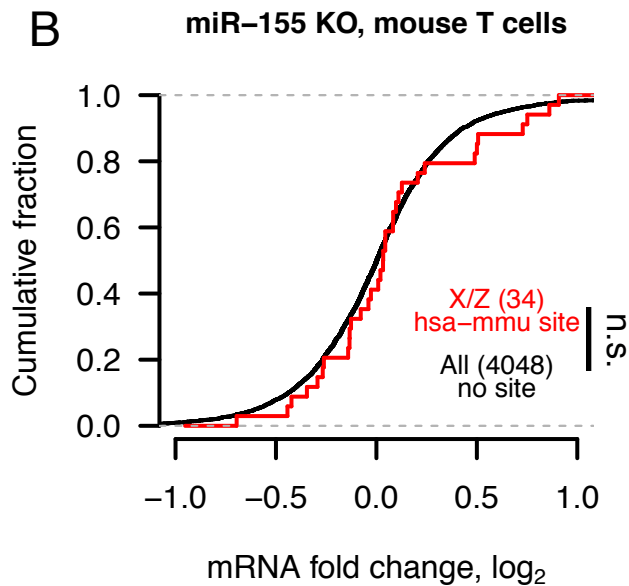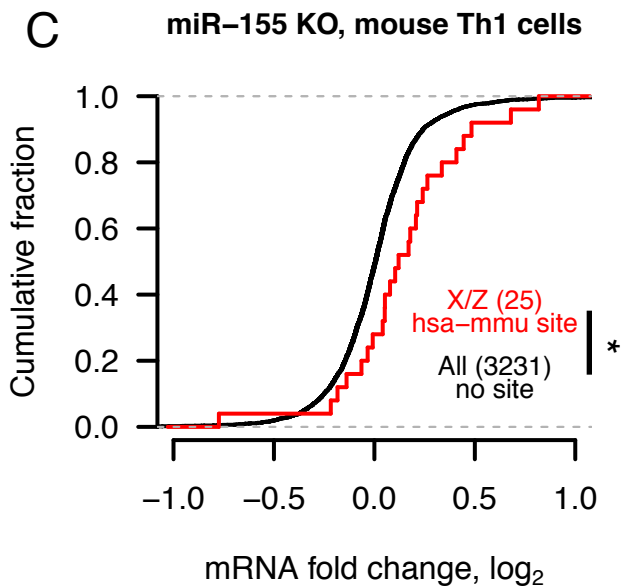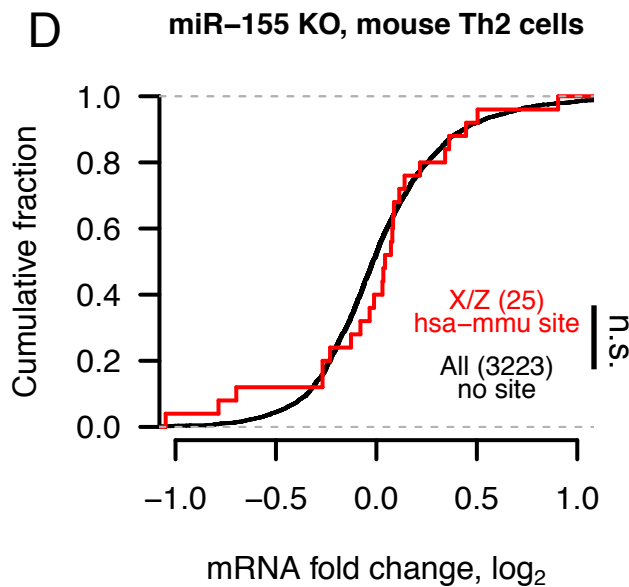

**A****post-miR-124 transfection**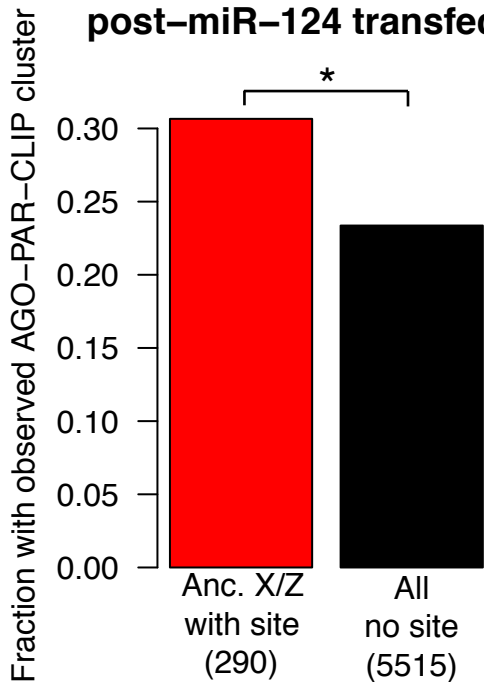**B****post-miR-7 transfection**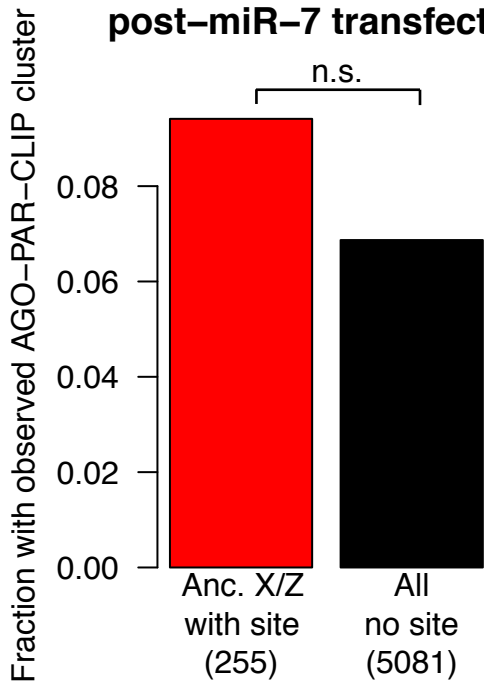

Source: http://biorxiv.org/content/10.1101/118729v3.full.pdf
